# Supplementary material
Source: MDPI journal article supplement (https://www.mdpi.com/2071-1050/15/6/4944)
Supplement: s1 [file s1]

**Table S1. Questionnaire used in the online survey.**

**Potential use of Chilean native species in living walls and green façades**

The data collected in this survey is intended for academic purposes only. Responses are completely anonymous, individual information of Professors and researchers from the Bioinnovation Center of the University of Antofagasta, the Faculty of Agricultural Sciences of the University of Chile and the Faculty of Chemistry and Biology of the University of Santiago carry out this study, which aims to analyze your opinion regarding the use of native flora with ornamental value and its use in vertical crops. The time required is a maximum of about 5 minutes.

1. Your participation in this study is completely voluntary, the questionnaire is anonymous and the answers will be confidential.
2. There are no risks to you from participating in this study.
3. You can withdraw from this study at any time.
4. By participating in this study, you agree that you have read and understood the information about the study.
5. This survey is intended for people over the age of 18 only.
6. Personal email addresses will not be collected to ensure data protection. It will only be used for statistical purposes, and data will be evaluated and presented in aggregate form.

**Basic information**

**1 Gender**

- Female
- Male
- I do not wish to disclose

**2 Age (years)**

- 18-25
- 26-40
- 41-65
- 66-80
- More than 80

**3 What is your maximum educational level completed?**

- No studies / Basic
- Middle
- Technical degree
- University degree
- Postgraduate

**4 Where did you grow up in?**

- Urban areas – Metropolitan Region
- Urban areas – Other Regions
- Non-urban /Rural areas – Metropolitan Region
- Non-urban /Rural areas – Other Regions

**5 Where do you presently live in?**

- Urban areas – Metropolitan Region
- Urban areas – Other Regions
- Non-urban /Rural areas – Metropolitan Region
- Non-urban /Rural areas – Other Regions

---

**6 Where do you presently live in?**

---

Self-acquired property

Rent

---

**7 How would you define the place where you live in?**

---

House with a small garden (<15m<sup>2</sup>)

House with a large garden (>15m<sup>2</sup>)

House without garden

Apartment with balcony

Apartment without balcony

---

**8 Are you interested in gardening?**

---

Not interested

Slightly interested

Indifferent

Quite interested

Very interested

---

**About Living Walls and Green Façades**

---

Living walls are advanced systems that cover buildings or façades indoors or outdoors, characterized by a root system integrated into the vertical system. The green façade are rooted in the ground or in planters.

---

---

**9 Before reading this text, did you know what a living wall was?**

---

Yes

No

---

**10 Before reading this text, did you know what a green façade was?**

---

Yes

No

---

**11 What is your opinion regarding the statement: "It would be a good idea to have a living wall and/or green façade inside my house or apartment"**

---

Strongly disagree

Disagree

Indifferent

Agree

Strongly agree

---

**12 What is your opinion regarding the statement: "It would be a good idea to have a living wall and/or a green façade in my garden or balcony"**

---

Strongly disagree

Disagree

Indifferent

Agree

Strongly agree

---

**Native plants of Chile**

---

A native (or autochthonous) species is the species that is naturally native to a given geographic region or ecosystem, and has not been introduced.

---

---

**13 Before reading this text, did you know what a native plant was?**

---

Yes

No

14 **What is your opinion regarding the statement: "It would be a good idea to have native plants inside my house or apartment"**

---

Strongly disagree  
Disagree  
Indifferent  
Agree  
Strongly agree

15 **What is your opinion regarding the statement: "It would be a good idea to have native plants in my garden or balcony"**

---

Strongly disagree  
Disagree  
Indifferent  
Agree  
Strongly agree

#### **Ornamental Plants Attributes**

An ornamental plant is the plant that is cultivated for its aesthetic characteristics and fulfills the function of decorating open or closed spaces.

---

16 **When choosing an ornamental plant for a living wall and/or a green façade inside my house, I consider important the:**

---

Native origin  
Flower color  
Flower size  
Fragrance  
Foliage characteristics  
Easy care  
Cost

17 **When choosing an ornamental plant for a living wall and/or a green façade in my garden or balcony, I consider important the:**

---

Native origin  
Flower color  
Flower size  
Fragrance  
Foliage characteristics  
Easy care  
Cost

18 **I would prefer to use native ornamental plants in my living wall and/or green façade because: (Strongly agree / Strongly disagree)**

---

They are more attractive  
Allow the conservation of species  
They adapt better to the environmental conditions where I live  
They are more original

19 **I would not prefer to use native ornamental plants in my living wall and/or green façade because: (Strongly agree / Strongly disagree)**

---

Are unknown  
They have a higher cost  
They are less available on the market  
They require more care

---
