# Supplementary material
Source: MDPI journal article supplement (https://www.mdpi.com/2071-1050/15/6/4944)
Supplement: s1 [file s1 › Table S2-Revised 3.xlsx]

## Sheet: North
Table S2. List of endemic and non-endemic Chilean species selected according to their ornamental value.
Growth habit	Family	Scientific name	Distribution	Growth habit (details)	Flower Color	Endemic/Non-endemic
Tree	Mimosaceae	Acacia caven(Molina) Molina	III-VIII	Arboreal	Golden yellow	Non-endemic
	Mimosaceae	Acacia macracantha	XV	Arboreal	Pale yellow	Non-endemic
	Caesalpinaceae	Caesalpinia spinosa (Molina) Kuntze	XV- R.M.	Arboreal	Yellow - orange	Non-endemic
	Caricaceae	Carica chilensis (Planch.ex A.DC.) Solms	III-V	Arboreal	Pale yellow	Endemic
	Boraginaceae	Cordia decandra Hook.et Arn.	III-IV	Arboreal		Endemic
	Papilionaceae	Geoffroea decorticans (Gillies ex Hook. Et Arn.) Burkart	XV-IV	Arboreal	Intense yellow	Non-endemic
	Mirtacea	Myrceugenia correifolia O. Berg	IV-VII	Arboreal		Endemic
	Miricaceae	Myrica pavonis C. DC.	I-XV	Arboreal	Reddish	Non-endemic
	Zigofilaceae	Porlieria chilensis I.M. Johnston	IV-VI	Arboreal	Purple	Endemic
	Mimosaceae	Prosopis alba Griseb.	XV-II	Arboreal	Yellow	Non-endemic
	Mimosaceae	Prosopis Chilensis (Molina) Stunts	III-VI	Arboreal	Yellow greenish	Non-endemic
	Mimosaceae	Prosopis flexuosa DC.	III-IV	Arboreal		Non-endemic
	Mimosaceae	Prosopis tamarugo Phil.	I	Arboreal	Yellow	Endemic
	Salicaceae	Salix humboldtiana Willd.	III-IX	Arboreal	Yellow	Non-endemic
	Anacardiaceae	Schinus areira L.	XV-R.M..	Arboreal	Greenish cream	Non-endemic
	Anacardiaceae	Schinus polygamus (Cav.) Cabrera		Arboreal/shrubby	Cream or white	Non-endemic
	Cactaceae	Eulychnia acida Phil.	III-IV	Arboreal	White	Endemic
	Cactaceae	Eulychnia iquiquensis (K. schum.) Britton & Rose	I-III	Arboreal	White ivory	Endemic
	Cactaceae	Eulychnia iquiquensis (K.Schum.) Britton & Rose	I - III	Arboreal		Endemic
	Cactaceae	Eulychnia saint-pieana F. Ritter	II - III	Arboreal		Endemic
Shrub	Papilionaceae	Adesmia Argentea Meyen	III	Shrubby	Yellow	Endemic
	Papilionaceae	Adesmia bedwellii Skottsb.	IV	Shrubby	Yellow	Endemic
	Papilionaceae	Adesmia littoralis Burkart	III-IV	Shrubby	Yellow	Endemic
	Papilionaceae	Adesmia melanocaulos Phil.	II-III	Shrubby	Yellow	Endemic
	Verbenaceae	Aloysia salviifolia (Hook. & Arn) Moldenke	III-IV	Shrubby	White	Endemic
	Amarantaceae	Alternanthera porrigens (Jacq.) Kuntze	II-III	Shrubby	Reddish	Non-endemic
	Amarantaceae	Alternanthera halimifolia (Lm.) Standl. Ex	XV-III	Shrubby	White/ivory/silver	Non-endemic
	Quenopodiaceae	Atriplex atacamensis Phil.	I-II	Shrubby		Endemic
	Quenopodiaceae	Atriplex deserticola Phil.	I-IV	Shrubby		Non-endemic
	Asteraceae	Baccharis salicifolia (Ruiz & Pav.)Pers	XV-X	Shrubby		Non-endemic
	Asteraceae	Baccharis scandens (Ruiz & Pav.)Pers	XV-III	Shrubby		Non-endemic
	Asteraceae	Bahia ambrosioides Lag.	I-V	Shrubby	Cream white	Endemic
	Ledocarpaceae	Balbisia peduncularis (Lindl.) D.Don	II-IV	Shrubby	Yellow	Endemic
	Berberidaceae	Berberis glomerata Hook. Et Arn	IV	Shrubby	Yellow	Endemic
	Sapindaceae	Bridgesia incisifolia Bert. Ex Cambess	III-V	Shrubby	Pink	Endemic
	Buddlejaceae	Buddleja suaveolens Kunth & Bouché	III-IV	Shrubby	Yellow	Endemic
	Zigofilaceae	Bulnesia chilensis Gay	III-IV	Shrubby	Yellow	Endemic
	Caesalpinaceae	Caesalpinia angulata (Hook. Et Arn.) Baill.	III-IV	Shrubby	Yellow	Endemic
	Caesalpinaceae	Caesalpinia aphylla Phil.	I	Shrubby	Yellow	Endemic
	Caesalpinaceae	Caesalpinia brevifolia Baill.	III-IV	Shrubby	Yellow	Endemic
	Escrofulariaceae	Calceolaria collina Phil.	III-IV	Shrubby	Yellow	Endemic
	Escrofulariaceae	Calceolaria paposana Phil.	II	Shrubby	Yellow	Endemic
	Mimosaceae	Calliandra chilensis Benth.	III-IV	Shrubby/Creeping/Creeper	Pink stamens	Endemic
	Asteraceae	Centaurea atacamensis (Reiche) I.M. Johnst.	III	SubShrub	White center , pinks ligules	Endemic
	Asteraceae	Centaurea cachinalensis Hook. et Arn.	II-III	SubShrub	Pink	Endemic
	Asteraceae	Centaurea chilensis Hook. et Arn.	IV-VIII	SubShrub	White yellow /pink	Endemic
	Asteraceae	Centaurea floccosa Hook. et Arn.	IV-V	SubShrub	Pink	Endemic
	Asteraceae	Chiquiraga ulicina (Hook. et Arn.) Hook.	I-IV	Shrubby	Yellow	Non-endemic
	Euforbiaceae	Croton chilensis Muell. Arg.	II	Shrubby	Yellow	Endemic
	Papilionaceae	Dalea azurea (Phil.) Reiche	II	Shrubby Creeping	Blue with white	En litoral- quebradas de paposo
	Malpighiaceae	Dinemagonum gayanum A. Juss.	III-IV	Shrubby	Yellow	Endemic
	Malpighiaceae	Dinemandra ericoides A. Juss.	II-III	Shrubby	Yellow	Endemic
	Asteraceae	Encelia canescens Lam.	II-IV	Subshrub/Shrubby	Yellows	Non-endemic
	Efedraceae	Ephedra breana Phil.	XV-IV	Shrubby	Red-white	Non-endemic
	Efedraceae	Ephedra gracilis Phil.	III-R.M.	Shrubby	Red-white	Endemic
	Papilionaceae	Errazurizia multifoliolata (Clos) I.M. Johnst.	II-IV	Shrubby	Yellow	Endemic
	Euforbiaceae	Euphorbia lactiflua Phil.	II-III	Shrubby	Yellow	Endemic
	Solanaceae	Fabiana imbricata Ruiz & Pav.	III-XI	Shrubby	White - Sky blue - Purple	Non-endemic
	Solanaceae	Fabiana viscosa Hook. et Arn.	III-IV	Shrubby	Yellow	Endemic
	Zigofilaceae	Fagonia chilensis Hook. et Arn.	I-IV	Subshrub	Pink / White	Non-endemic
	Asteraceae	Flourensia thurifera (Molina) DC.	IV-VI	Shrubby	Yellow	Endemic
	Frankeniaceae	Frankenia chilensis C. Presl	I-IV	Subshrub	Pink	Non-endemic
	Onagraceae	Fuchsia lycioides Andrews	Iv-V	Shrubby	dark pink	Endemic
	Verbenaceae	Glandularia atacamensis (Reiche) J.M	I-III	Subshrub	White	Non-endemic
	Verbenaceae	Glandularia sulphurea (D.Don) Schnack & covas	II-X	Subshrub	Yellow	Non-endemic
	Solanaceae	Grabowskia glauca (Phil.) I.M Johnst.	II	Shrubby	lilacs	Endemic
	Asteraceae	Grindelia glutinosa (Cav.) Dunal	XV	Shrubby	Yellow	Non-endemic
	Asteraceae	Gutierrezia gayana (J. Remy) Reiche	III-IV	Shrubby	White	Endemic
	Umbelíferas	Gymnophyton Robustum Clos	III-IV	Shrubby	Yellow	Endemic
	Asteraceae	Gypothamnium pinifolium Phil.	II-III	Shrubby	Dark Purple	Endemic
	Boraginaceae	Heliotropium spp.	I-VII,XII, R.M.	Shrubby	Yellow- White- or violet	Endemic
	Boraginaceae	Heliotropium longystilum Phil	III	Shrubby	White	Endemic
	Boraginaceae	Heliotropium sinuatum (Miers) I.M.Johnst	III	Shrubby	White	Endemic
	Boraginaceae	Heliotropium stenophyllum Hook. and Arn.	IV-V	Shrubby	White	Endemic
	Boraginaceae	Heliotropium taltalense (Phil.) I.M.Johnst.	II	Shrubby	White	Endemic
	Boraginaceae	Heliotropium filifolium (Miers) I.M.Johnst.	III	Shrubby	White	Endemic
	Boraginaceae	Heliotropium eremogenum I.M.Johnst.	II	Shrubby	White	Endemic
	Boraginaceae	Heliotropium floridum (A. DC.) Clos	III	Shrubby	White	Endemic
	Boraginaceae	Heliotropium linariifolium Phil.	III-IV	Shrubby	White	Endemic
	Boraginaceae	Heliotropium Pycnophyllum Phil.	II-III	Shrubby	White	Endemic
	Boraginaceae	Heliotropium chenopodiaceum (A. DC.) Clos	III-IV	Shrubby	White	Endemic
	Boraginaceae	Heliotropium myosotifolium (A. DC.) Reiche	III	Shrubby	White	Endemic
	Boraginaceae	Heliotropium megalanthum I.M.Johnst.	III	Shrubby	White- orange centre	Endemic
	Verbenaceae	Junellia selaginoides (Kunth ex Walp.) Moldenke	II-IV	Shrubby	Blue-Purple	Endemic
	Krameriaceae	Krameria cistoidea Hook. and Arn	II- R.M.	Shrubby	Intense pink	Endemic
	Sapindaceae	Llagunoa glandulosa (Hook. et Arn.) G. Don	IV- R.M.	Shrubby	Green	Endemic
	Solanaceae	Lycium Leiostemum Wedd.	II-III	Shrubby	White	Endemic
	Solanaceae	Lycium Stenophyllum J. Remy	I-IV	Shrubby	White	Endemic
	Malesherbiaceae	Malesherbia auristipulata Ricardi	XV-I	Shrubby	Red	Endemic
	Malesherbiaceae	Malesherbia Tenuifolia D. Don	XV-I	Shrubby	Yellow	Endemic
	Malesherbiaceae	Malesherbia Fasciculata D. Don	IV-VI	Shrubby	Cream white/ white pink	Endemic
	Brassicaceae	Mathewsia incana Phil.	II-III	Shrubby	Yellow	Endemic
	Loasaceae	Mentzelia chilensis Gay	II-IV	Subshrub	Yellow Orange	Non-endemic
	Escrofulariaceae	Monttea chilensis Gay	II, IV, V	Shrubby	Dark violet	Endemic
	Mirtaceae	Myrcuanthes coquimbensis (Barnéoud) Landrum	IV	Shrubby	White	Endemic
	Solanaceae	Nicotiana solanifolia Walp.	XV-III	Shrubby	Greenish yellow	Endemic
	Solanaceae	Nolana spp.	II	Subshrub	White to Dark Blue (minus Yellow and Pink)	Endemic and Non-endemic
	Asteraceae	Ophryosporus paradoxus (Hook. et Arn.) Benth.	III-VI	Shrubby	White ivory	Endemic
	Asteraceae	Ophryosporus triangularis Meyen	IV-V	Shrubby	White ivory	Endemic
	Oxalidaceae	Oxalis gigantea Barnéoud	II-IV	Shrubby	Yellow	Endemic
	Asteraceae	Oxyphyllum ulicinum Phil.	II-III	Shrubby	White-violet	Endemic
	Solanaceae	Phrodus microphyllus (Miers) Miers	III-IV	Shrubby	Cream white	Endemic
	Zigofilaceae	Pintoa chilensis Gay	III	Shrubby/ Creeping	Yellow	Endemic
	Asteraceae	Pleocarphus revolutus D.Don	III-IV	Shrubby	Clear Yellow	Endemic
	Litraceae	Pleurophora pungens D.Don	II-VI	Subshrub	pink	Endemic
	Plumbaginaceae	Plumbago caerulea Kunth	II-IV	Shrubby Creeping	Blue	Non-endemic
	Asteraceae	Polyachyrus cinereus Ricardi & Weldt	II-III	SubShrubby	White to pink	Endemic
	Asteraceae	Polyachyrus Fuscus Meyen & Walp.	I-IV	SubShrubby	White to pink	Non-endemic
	Asteraceae	Polyachyrus poeppigii (Kunze ex Lees.) Less.	III-VII	SubShrubby	White to pink	Endemic
	Mimosaceae	Prosopis x burkartii Muñoz	I	Shrubby	Yellow	Non-endemic
	Mimosaceae	Prosopis strombulifera (Lam.) Benth.	I-III	Shrubby	Yellow	Non-endemic
	Asteraceae	Proustia cuneifolia D.Don	II-III	Shrubby		Endemic
	Asteraceae	Proustia ilicifolia Hook. et Arn. Fma baccharoides (D. Don) Fabris	III-R.M.	Shrubby	White	Endemic
	Solanaceae	Salpiglossis spinescens Clos	III	Shrubby	White	Endemic
	Labiadas	Salvia gilliesii Benth.	II	Shrubby	White /Purple	Non-endemic
	Labiadas	Salvia tubiflora Sm.	II	Shrubby	Intense red	Non-endemic
	Quenopodiaceae	Sarcocornia neei (Lag.) M.A.Alonso & M.B. Crespo	I-IX	Shrubby	Red	Non-endemic
	Asteraceae	Senecio murorum J.Remy	III-R.M.	Shrubby	Yellow	Endemic
	Asteraceae	Senecio planiflorus Kunze ex Cabrera	IV-VIII	Shrubby	Yellow	Endemic
	Caesalpinaceae	Senna Brogniartii (Gaud.) Irw & Barneby	I-II	Shrubby	Yellow	Non-endemic
	Caesalpinaceae	Senna cumingii (Hook. et Arn.) Irw & Barneby	II-V	Shrubby	Yellow	Endemic
	Caesalpinaceae	Senna paposana (Phil.) Zoellner & San Martín	II	Shrubby	Yellow	Endemic
	Apocinaceae	Skytanthus acutus Meyen	II-IV	Shrubby	Yellow	Endemic
	Solanaceae	Solanum brachyantherum Phil.	XV-III	Subshrub	pale sky blue	Non-endemic
	Solanaceae	Solanum trinominum J.R. Benn.	III-V	Shrubby	pale blue to white	Endemic
	Solanaceae	Solanum pinnatum Cav.	II-IV	Shrubby	Lila	Endemic
	Solanaceae	Solanum remyanum Phil.	II-III	Shrubby	Dark violet	Endemic
	Malvaceae	Sphaeralcea obtusiloba D. Don	IV-VI	Subshrub	BluePurplish	Endemic
	Quenopodiaceae	Suaeda foliosa Moq.	I-IV	Subshrub		Non-endemic
	Quenopodiaceae	Suaeda multiflora Phil.	III	Subshrub		Endemic
	Bignoniaceae	Tecoma fulva (Cav.) D.Don	XV	Shrubby	Red to orange	Non-endemic
	Asteraceae	Tessaria absinthioides (Hook. et Arn.) DC.	I-VIII	Shrubby	Pink	Non-endemic
	Aizoaceae	Tetragonia angustifolia Barnéoud	I-IV	Shrubby	Greenish yellow	Endemic
	Aizoaceae	Tetragonia maritima Barnéoud	II-IV	Shrubby	Greenish yellow	Endemic
	Labiadas	Teucrium nudicaule Hook.	II-IV	Subshrub	White/reddish	Endemic
	Cactaceae	Eulychnia breviflora Phil.	II-IV	Shrubby	Pink	Endemic
	Cactaceae	Leucostele nigripilis (Phil.) P.C.Guerrero & Helmut Walter	III-IV	Shrubby	White	Endemic
	Cactaceae	Leucostele deserticola (Werderm.) Schlumpb.	II-III	Shrubby	White	Endemic
	Cactaceae	Eriosyce aurata (Pfeiff.) Backeb.	III-R.M.	Shrubby	Red	Endemic
	Cactaceae	Eriosyce rodentiophila F.Ritter	II-III	Shrubby	Brillant red	Endemic
	Cactaceae	Eriosyce subgibbosa (Haw.) Katt.	III-VIII	Shrubby	Pink	Endemic
	Cactaceae	Eriosyce eriosyzoides (F. Ritter) Ferryman	III-IV	Shrubby	Yellow	Endemic
	Cactaceae	Eriosyce napina (Phil.) Katt.	III	Sub shrub	Ρed to Yellow	Endemic
	Cactaceae	Copiapoa cinerascens (Salm-Dyck) Britton & Rose	III	Shrubby	Yellow	Endemic
	Cactaceae	Copiapoa cinerea (Phil.) Britton & Rose	II-III	Shrubby	Yellow	Endemic
	Cactaceae	Copiapoa coquimbana (Karw. ex Rümpler) Britton & Rose	III- IV	Shrubby	Yellow	Endemic
	Cactaceae	Copiapoa dealbata F.Ritter.	III	Shrubby	Ivory- Pale Yellow	Endemic
	Cactaceae	Copiapoa fiedleriana (K.Schum.) Backeb.	III	Sub shrub	Yellow	Endemic
	Cactaceae	Copiapoa solaris (F.Ritter) F.Ritter	II	Shrubby	Yellow or pink	Endemic
	Cactaceae	Cumulopuntia sphaerica (C.F. Först.) E.F. Anderson	I-R.M.	Sub shrub	Intense yellow	Non-endemic
	Cactaceae	Miqueliopuntia miquelii (Monv.) F. Ritter	III-IV	Shrubby	Pink	Endemic
Climbing/creeping	Asclepiadaceae	Diplolepis geminiflorus (Decne.) Liede & rapini	II-R.M.	Creeper	White to Purple	Endemic
	Asclepiadaceae	Diplolepis boerhaviifolia (Hook. et Arn.) Liede & Rapini	II-R.M.	Creeper	Purple	Endemic
	Asclepiadaceae	Diplolepis viridis (Phil.) Hechem & C. Ezcurra	I-IV	Creeper	Greenish ivory	Endemic
	Asteraceae	Mutisia cana Poepp.	III-R.M.	Creeper	Red	Endemic
	Asteraceae	Mutisia spectabilis Phil.	IV-V	Creeper	Red	Endemic
	Cucurbitaceae	Sicyos baderoa Hook. et Arn.	II-R.M.	Creeper	Green yellowish/White	Non-endemic
	Tropeolaceae	Tropaeolum austropurpureum (J.M.Watson & A.R. Flores) J.M.Watson & A.R. Flores	IV	Creeper	Violet	Endemic
	Tropeolaceae	Tropaeolum azureum Miers ex Colla	II-R.M.	Creeper	Blue-purplish	Endemic
	Tropeolaceae	Tropaeolum beuthii Klotzsch	II	Creeper	Greenish yellow	Endemic
	Tropeolaceae	Tropaeolum hookerianum Barnéoud	IV	Creeper	Yellow	Endemic
	Tropeolaceae	Tropaeolum hookerianum	IV	Creeper	Yellow	Endemic
	Tropeolaceae	Tropaeolum tricolor Sweet	II-IX	Creeper	Red to orange	Endemic
	Asclepiadaceae	Tweedia birostrata (Hook. et Arn.) Hook. et Arn.	II-VIII	Creeper	Purple	Endemic
	Asclepiadaceae	Tweedia stipitata G.H Rua & Liede	IV	Creeper	Purple	Endemic
Herbaceous	Alstroemeriaceae	Alstroemeria crispata Phil.	III-IV	Herb	Pink/ Yellow	Endemic
	Alstroemeriaceae	Alstroemeria graminea Phil.	II-III	Herb	White-pale pink	Endemic
	Alstroemeriaceae	Alstroemeria kingii Phil.	III	Herb	Yellow	Endemic
	Alstroemeriaceae	Alstroemeria leporina Ehr. Bayer & Grau	III-IV	Herb	pink	Endemic
	Alstroemeriaceae	Alstroemeria magnifica Herb.	III-V, R.M.	Herb	White-Intense lilac, pale pink	Endemic
	Alstroemeriaceae	Alstroemeria philippii Baker	III-IV	Herb	dark purplish	Endemic
	Alstroemeriaceae	Alstroemeria schizanthoides Grau	III-IV	Herb	pale pink lilacea	Endemic
	Alstroemeriaceae	Alstroemeria Purplish Phil.	XV-III	Herb	pale violet	Endemic
	Alstroemeriaceae	Alstroemeria werdermannii Ehr. Bayer	III-IV	Herb	Pink purpureo	Endemic
	Papaveraceae	Argemone hunnemanni Otto & A. Dietr.	II-VII	Herb	White	Non-endemic
	Papaveraceae	Argemone rosea Hook.	III-IV	Herb	White-pink	Endemic
	Papaveraceae	Argemone subfusiformis G.B. Ownbey	I-R.M.	Herb	Yellow	Non-endemic
	Bignoniaceae	Argylia radiata (L.) D.Don	I-IV	Herb	Yellow to Purple	Non-endemic
	Aristoloquiaceae	Aristolochia chilensis Bridges ex Lindl.	III-R.M.	Creeping herb	Purple-yellowish	Endemic
	Aristoloquiaceae	Aristolochia pearcei Phil.	III-IV	Creeping herb	Yellow	Endemic
	Calceolariaceae	Calceolaria glandulosa Poepp. ex Benth. subs. glandulosa	III-IV	Herb	intense yellow	Endemic
	Calceolariaceae	Calceolaria latifolia Benth.	IV-V	Herb	pale yellow to beige	Endemic
	Calceolariaceae	Calceolaria lepida Phil.	III-IV	Herb	Yellow	Endemic
	Calceolariaceae	Calceolaria picta Phil.	IV	Herb	pink	Endemic
	Asteraceae	Chaetanthera glabrata (DC.) Meigen	II-R.M.	Herb	Yellow	Endemic
	Asteraceae	Chaetanthera limbata (D.Don) Lees.	II-R.M.	Herb	Yellow	Endemic
	Asteraceae	Chaetanthera linearis Poepp. Ex Less.	II-R.M.	Herb	White	Endemic
	Asteraceae	Cistanthe amarantoides (Phil.) Carolin ex Hershkovitz	I-V	Herb		Endemic
	Asteraceae	Cistanthe celosioides (Phil.) Carolin ex Hershk.	XV-III	Herb		Non-endemic
	Asteraceae	Cistanthe arancioana Peralta	II	SubShrubby		Endemic
	Asteraceae	Cistanthe salsoloides (Bernéoud) Carolin ex Hershk.	II-IV	SubShrubby		Non-endemic
	Asteraceae	Cistanthe grandiflora (Lindl.) Schltdl.	III-IV	Herb		Endemic
	Asteraceae	Calandrinia cachinalensis Phil.	I-III	Herb		Endemic
	Asteraceae	Calandrinia lamprosperma I.M.Johnston	II	Herb	Light-dark pink	Endemic
	Asteraceae	Cistanthe speciosa Lehm.	III	Herb		Endemic
	Asteraceae	Calandrinia taltalensis I.M.Johnston	II	Herb		Endemic
	Asteraceae	Cistanthe coquimbensis (Barnéoud) Carolin ex Hershk.	IV	Herb	White to red	Endemic
	Asteraceae	Calandrinia litoralis Phil.	II-IV	Herb	Yellow	Endemic
	Asteraceae	Cistanthe longiscapa (Barnéoud) Carolin ex Hershk.	II-IV	Herb	pink/ White	Endemic
	Asteraceae	Cistanthe arenaria (Cham.) Carolin ex Hershk.	III-IX	Herb		Non-endemic
	Capparidaceae	Cleome chilensis DC.	XV-III	Herb	White	Non-endemic
	Gramíneas	Cortaderia speciosa (Nees & Meyen) Stapf	III-IV	Herb	Ocher Yellow	Non-endemic
	Malvaceae	Cristaria aspera	II-IV	Herb		Endemic
	Malvaceae	Cristaria cyanea	III	Herb		Endemic
	Malvaceae	Cristaria glaucophylla	III-IV	Herb		Endemic
	Malvaceae	Cristaria gracilis	III	Herb		Endemic
	Malvaceae	Cristaria integerrima	II	Herb		Endemic
	Malvaceae	Cristaria molinae	II	Herb		Endemic
	Malvaceae	Cristaria viridi-luteola	III	Herb		Endemic
	Rubiaceae	Cruckshanksia hymenodon Hook. et Arn.	II-IV	Herb	White	Endemic
	Rubiaceae	Cruckshanksia monttiana Clos	III-IV	Herb	Yellow	Endemic
	Rubiaceae	Cruckshanksia pumila Clos	II-IV	Herb	Yellow	Endemic
	Dioscoreaceae	Dioscorea fastigiata Gay	II-IV	Creeping herb		Endemic
	Caesalpinaceae	Hoffimannseggia prostrata Lag. ex DC.	XV-III	Creeping herb	Yellow	Non-endemic
	Alstroemeriaceae	Leontochir ovallei Phil	III	Herb	red / Yellow	Endemic
	Asteraceae	Leucheria cumingii Hook. et Arn.	II-IV	Herb	White- pale pink	Endemic
	Alliaceae	Leucocoryne appendiculata Phil.	XV-III	Herb	White	Endemic
	Alliaceae	Leucocoryne coquimbensis F.Phil.	IV-V	Herb	lilac or Purple	Endemic
	Alliaceae	Leucocoryne coquimbensis	IV	Herb	White	Endemic
	Alliaceae	Leucocoryne coronata Ravenna	III	Herb	pale white-pink	Endemic
	Alliaceae	Leucocoryne dimorphopetala (Gay) Ravenna	III-IV	Herb	White yellowish	Endemic
	Alliaceae	Leucocoryne purpurea Gay	IV	Herb	red/Yellow/White/Purple	Endemic
	Alliaceae	Leucocoryne Vitatta Ravenna	IV-V	Herb	Purple/Blue/white	Endemic
	Malesherbiaceae	Malesherbia humilis Poepp.	II-VII	Herb	Violet to White	Endemic
	Malesherbiaceae	Malesherbia multiflora Ricardi	II-IV	Herb		Endemic
	Nictaginaceae	Mirabilis elegans (Choisy) heimerl	I-V	Herb	White to intense fuchsia	Non-endemic
	Nictaginaceae	Mirabilis acuta (Reiche) Heimerl	I-IV	Herb	White to intense fuchsia	Non-endemic
	Nictaginaceae	Mirabilis ovata (Ruiz & Pav.) F. Meigen	II-IV	Herb	White to intense fuchsia	Non-endemic
	Solanaceae	Nolana acuminata (Miers) Miers ex Dunal	III-IV	Herb	Blue/White	Endemic
	Solanaceae	Nolana aplocaryoides (Gaud.) I.M Johnst	I-III	Herb	Blue/White	Endemic
	Solanaceae	Nolana baccata (Lindl.) Dunal	III	Herb		Endemic
	Solanaceae	Nolana elegans (Phil.) Reiche	II-III	Herb	Blue and Purple	Endemic
	Solanaceae	Nolana onoana M.O Dillon & M. Nakaz	II	Herb		Endemic
	Solanaceae	Nolana parviflora (Phil.) Phil.	III	Herb		Endemic
	Solanaceae	Nolana pterocarpa Phil. ex Wettst	III	Herb		Endemic
	Solanaceae	Nolana rupicola Gaudich.	II-IV	Herb	Blue and Purple	Endemic
	Solanaceae	Nolana reichei M.O. Dillon & Arancio	IV	Herb	Yellow- black- reddish brown- white- blue- violet	Endemic
	Onagraceae	Oenothera coquimbensis Gay	II-V	Herb	Yellow	Endemic
	Iridaceae	Olsynium scirpoideum (Poepp.) Goldblatt	I-IX	Herb	White- pink	Endemic
	Oxalidaceae	Oxalis arbuscula Barnéoud	II-III	Herb	Yellow	Endemic
	Oxalidaceae	Oxalis atacamensis Reiche	II	Herb	Yellow	Endemic
	Oxalidaceae	Oxalis bulbocastanum Phil.	XV-III	Herb	Yellow	Endemic
	Oxalidaceae	Oxalis johnstonii Knuth	II-III	Herb	Yellow	Endemic
	Oxalidaceae	Oxalis matancillae Lourt	II	Herb	Yellow	Endemic
	Oxalidaceae	Oxalis megalorrhiza (Feuille) Jacq.	I-VIII	Herb	Yellow	Non-endemic
	Oxalidaceae	Oxalis morenoensis Lourteig	II	Herb	Yellow	Endemic
	Oxalidaceae	Oxalis pachyrrhiza Wedd	II-VII	Herb	Yellow	Non-endemic
	Oxalidaceae	Oxalis rigida (Barnéoud) Lourteig	III-IV	Herb	Yellow	Non-endemic
	Oxalidaceae	Oxalis ricardii Louteig	II	Herb	Yellow	Endemic
	Oxalidaceae	Oxalis leucophylla Phil.	III	Herb	Yellow	Endemic
	Oxalidaceae	Oxalis ornithopus Phil.	II-III	Herb	Yellow	Endemic
	Oxalidaceae	Oxalis ovalleana Phil.	II-IV	Herb	Yellow	Endemic
	Oxalidaceae	Oxalis tortuosa Lindl	IV-VI	Herb	Yellow	Endemic
	Oxalidaceae	Oxalis compacta Gillies ex Hook. & Arn.	IV-VIII	Herb	Yellow	Non-endemic
	Oxalidaceae	Oxalis eremobia Phil.	II-III	Herb	Yellow	Endemic
	Oxalidaceae	Oxalis laxa Hook. Et Arn	II-IV	Herb	Yellow	Non-endemic
	Hyacinthaceae	Oziroe biflora (Ruiz & Pav.) Speta	XV-IV	Herb	White	Non-endemic
	Hemerocallidaceae	Pasithea Caerulea (Ruiz et Pav.) D. Don	II-X	Herb	Blue	Non-endemic
	Piperaceae	Peperomia coquimbensis Skottsb.	IV	Herb		Endemic
	Piperaceae	Peperomia doellii Phil.	II-IV	Herb		Endemic
	Piperaceae	Peperomia fernandeziana Miq.	IV,V, XIV, X, J.F.	Herb		Endemic
	Asteraceae	Perityle emoryi Torr.	XV-IV	Herb	White	Non-endemic
	Verbenaceae	Phyla reptans (Kunth) Greene	I-III, IX, R.M.	Creeping herb	white to lilac	Non-endemic
	Amarilidaceae	Placea amoena Phil.	IV	Herb	Purple red	Endemic
	Asteraceae	Polyachyrus annuus I.M Johnst.	XV-III	Herb	pink	Non-endemic
	Amarilidaceae	Rhodophiala ananuca (Phil.) Traub	III	Herb	white to Pink	Endemic
	Amarilidaceae	Rhodophiala bagnoldii (Herb.) Traub	II-IV	Herb	Yellow	Endemic
	Amarilidaceae	Rhodophiala laeta Phil.	II-III	Herb	intense pink	Endemic
	Amarilidaceae	Rhodophiala phycelloides (Herb.) Hunz.	III-IV	Herb	intense network	Endemic
	Solanaceae	Schizanthus candidus Lindl.	III-IV	Herb	White	Endemic
	Solanaceae	Schizanthus lacteus Phil.	II	Herb	White	Endemic
	Solanaceae	Schizanthus Laetus Phil.	XV-III	Herb	light to dark Purple	Endemic
	Solanaceae	Schizanthus litoralis Phil.	IV-V	Herb	violet	Endemic
	Solanaceae	Schizanthus Parvulus Sudzuki	IV	Herb	violet with white spot	Endemic
	Solanaceae	Schizanthus porrigens Graham	III-IV	Herb	Pink purplish	Endemic
	Solanaceae	Schizanthus integrifolius Phil.	III-IV	Herb	White	Endemic
	Crucíferas	Schizopetalon bipinnatifidum Phil.	III-IV	Herb	White to cream	Endemic
	Crucíferas	Schizopetalon maritimum Barnéoud	III-IV	Herb	White to cream	Endemic
	Crucíferas	Schizopetalon tenuifolium Reiche	III	Herb	White to cream	Endemic
	Crucíferas	Schizopetalon walkeri Sims	IV-VIII	Herb	White to cream	Endemic
	Crucíferas	Schizopetalon arcuatum Al-Shehbaz	III	Herb	White to cream	Endemic
	Crucíferas	Schizopetalon biseriatum Phil.	III	Herb	White to cream	Endemic
	Crucíferas	Schizopetalon corymbosum Al-Shehbaz	IV	Herb	White to cream	Endemic
	Crucíferas	Sibara anethifolia (Phil.) Al-Shehbaz	II-III	Herb	White	Endemic
	Iridaceae	Sisyrinchium graminifolium Lindl.	II-IX	Herb	Yellow	Non-endemic
	Solanaceae	Solanum chilense (Dunal) Reiche	XV-III	Herb	Yellow	Endemic
	Aizoaceae	Tetragonia microcarpa Phil.	I-III	Herb	Yellow	Non-endemic
	Aizoaceae	Tetragonia ovata Phil.	I-IV	Herb	Yellow	Endemic
	Aizoaceae	Tetragonia pedunculata Phil.	III	Herb	Yellow	Non-endemic
	Aizoaceae	Tetragonia copiapina Phil.	II-III	Herb		Endemic
	Aizoaceae	Tetragonia macrocarpa Phil.	III-IV	Herb		Endemic
	Iridaceae	Tigridia Philippiana I.M. Johnst.	I-II	Herb	White yellowish	Endemic
	Violaceae	Viola polypoda Turcz.	I-IV	Herb	Yellow	Endemic
	Violaceae	Viola taltalensis W. Becker	II	Herb	White-violet	Endemic
	Violaceae	Viola huesoensis Martic.	II	Herb		Endemic
	Violaceae	Viola johnstonii W.Becker.	II	Herb		Endemic
	Tecofilaceae	Zephyra compacta C. Ehrh.	III-IV	Herb	White	Endemic
	Tecofilaceae	Zephyra elegans D.Don	XV-IV	Herb	White to Sky blue	Endemic
	Alliaceae	Zoellnerallium serenense (Ravenna) Crosa	III-IV	Herb	White	Endemic
	Bromeliaceae	Deuterocohnia chrysantha (Phil.) Mez	II-III	Herb	Yellow	Endemic
	Bromeliaceae	Puya alpestris (Poepp.) Gay	IV-IX	Herb	Bluegreenish	Endemic
	Bromeliaceae	Puya boliviensis Baker	II-III	Herb	Yellow	Endemic
	Bromeliaceae	Puya chilensis Molina	IV- VIII	Herb	Greenish yellow	Endemic
	Bromeliaceae	Puya gilmartiniae G.S. Varad. & A.R. Flores	IV	Herb	Yellow	Endemic
	Bromeliaceae	Puya venusta Phil.	IV- V	Herb	Purple	Endemic
	Bromeliaceae	Tillandsia capillaris Ruiz & Pav.	XV- V	Epiphytic herb	White- brown or yellow	Non-endemic
	Bromeliaceae	Tillandsia geissei Phil.	II- IV	Epiphytic herb	Fuchsia	Endemic
	Bromeliaceae	Tillandsia landbeckii Phil.	I- IV	Epiphytic herb	Yellow- brown or Purple	Non-endemic
	Bromeliaceae	Tillandsia marconae W.Till & Vitek	I- XV	Epiphytic herb	Blueviolet	Non-endemic
Fern	Equisetaceae	Equisetum bogotense Kunth	XV-XI	Fern	X	Non-endemic
	Equisetaceae	Equisetum giganteum L.	XV-I	Fern	X	Non-endemic
	Equisetaceae	Equisetum pyramidale Goldm.	IV-X	Fern	X	Endemic
	Adiantaceae	Adiantum chilense Kaulf	I-XII, XIV-XVI, R.M., JFE	Fern	X	Non-endemic
	Adiantaceae	Adiantum glanduliferum Link	II-VIII, XVI, R.M.	Fern	X	Non-endemic
	Pteridaceae	Cheilanthes hypoleuca (Kunze) Mett.	IV-IX, R.M	Fern	X	Non-endemic
	Pteridaceae	Cheilanthes mollis (Kunze) K. Presl	I-VI, X, R.M.	Fern	X	Non-endemic
	Aspleniaceae	Notholaena sulphurea (Cav.) J.Sm	III	Fern	X	Non-endemic
	Pteridaceae	Pellaea myrtillifolia Mett. ex Kuhn	III-VI, R.M.	Fern	X	Endemic
	Pteridaceae	Pellaea ternifolia (Cav.) Link	I, II,V, VI, VIII-IX, XIV, XV	Fern	X	Non-endemic

## Sheet: Centre
Table S2. List of endemic and non-endemic Chilean species selected according to their ornamental value.
Growth habit	Family	Scientific name	Distribution	Growth habit (details)	Flower Color	Endemic/Non-endemic
Tree	Mimosaceae	Acacia caven(Molina) Molina	III-VIII	Arboreal	Yellow-golden	Non-endemic
	Aextoxicaceae	Aextoxicon punctatum Ruiz et Pav.	IV-X	Arboreal		Non-endemic
	Eleocarpaceae	Aristotelia chilensis (Molina) Stuntz	IV-XI, J.F.	Arboreal	Yellow	Non-endemic
	Cupresaceae	Austrocedrus chilensis (D.Don) Pic. Serm. et Bizzarri	V-XI	Arboreal		Non-endemic
	Salicaceae	Azara celastrina D.Don	IV, VIII	Arboreal	Yellow	Endemic
	Salicaceae	Azara petiolaris (D.Don) I.M.Johnst.	IV, VII	Arboreal	Yellow	Endemic
	Verbenaceae	Beilshmiedia miersii (Gay) Kosterm.	V-R.M., VI	Arboreal	White-Yellow	Endemic
	Caesalpinaceae	Caesalpinia spinosa (Molina) Kuntze	I-R.M.	Arboreal	Yellow-Orange	Non-endemic
	Icacinaceae	Citronella mucronata (Ruiz et Pav.) D.Don	IV-X	Arboreal	White-Yellow	Endemic
	Eleocarpaceae	Crinodendron patagua Molina	V-VIII	Arboreal	White	Endemic
	Lauraceae	Cryptocarya alba (Molina) Looser	IV-XIV	Arboreal	Greenish	Endemic
	Winteraceae	Drimys winteri J.R. Forst et G. Forst.	IV-XII	Arboreal/shrubby	White	Endemic
	Escalloniaceae	Escallonia Myrtoidea Bertero ex DC.	IV-X	Arboreal	White	Endemic
	Palmaceae	Jubaea chilensis (Molina) Baill.	IV-VII	Arboreal		Endemic
	Rosaceae	Kageneckia angustifolia D.Don	IV-VII	Arboreal	White	Endemic
	Rosaceae	Kageneckia oblonga Ruiz et Pav.	IV-VIII	Arboreal/shrubby	White	Endemic
	Anacardiaceae	Lithraea caustica (Molina) Hook. et Arn.	IV-IX	Arboreal	Yellow-greenish	Endemic
	Proteaceae	Lomatia hirsuta (Lam.) Diels	IV-X	Arboreal	Cream	Non-endemic
	Celastraceae	Maytenus boaria Molina	III-X	Arboreal	Green yellowish	Non-endemic
	Mirtaceae	Myrceugenia correifolia (Hook et Arn.) Berg	IV-VII	Arboreal/shrubby	White	Endemic
	Mirtaceae	Myrceugenia exsucca (DC.) Berg	IV-X	Arboreal	White	Non-endemic
	Fagaceae	Nothofagus dombeyi (Mirb.) Oerst.	VI-XI	Arboreal		Non-endemic
	Fagaceae	Nothofagus glauca (Phil.) Krasser	VI-VIII	Arboreal		Endemic
	Fagaceae	Nothofagus macrocarpa (A.DC.) F.M. Vazquez et R.A. Rodr.	V-R.M., VI	Arboreal		Endemic
	Fabaceae	Otholobium glandulosum (L.) J.W.Grimes	IV-X	Arboreal	Light blue	Endemic
	Lauraceae	Persea lingue (Ruiz & Pav.) Nees	V-XI	Arboreal	Yellow	Non-endemic
	Monimiaceae	Peumus boldus Molina	IV-XIV	Arboreal/shrubby	White-cream	Endemic
	Zigofilaceae	Porliera chilensis I.M.Johnston	IV-VI	Arboreal	Dark Purple	Endemic
	Mimosaceae	Prosopis chilensis (Molins) stuntz	III-IV	Arboreal	Greenish yellow	Non-endemic
	Rosaceae	Quillaja saponaria Molina	IV-VIII	Arboreal	White-yellowish	Endemic
	Verbenaceae	Rhaphithamnus spinosus (Juss.) Moldenke	IV-XI	Arboreal/shrubby	Violet	Non-endemic
	Salicaceae	Salix humboldtiana Willd.	III-VIII	Arboreal	Yellow	Non-endemic
	Anacardiaceae	Schinus latifolius (Gillies ex Lindl.) Engl.	IV-VII	Arboreal	White ivory	Endemic
	Anacardiaceae	Schinus polygamus (Cav.) Cabrera	III-XIV	shrubby	White cream	Non-endemic
	Asteraceae	Senecio yegua Cabrera	IV-IX	Arboreal	Yellow	Endemic
Shrub	Euforbiaceae	Adenopeltis serrata (W.T.Aiton) I.M. Johnst.	IV-VIII	Shrubby		Endemic
	Fabaceae	Adesmia confusa Ulibarri	IV-VI	Shrubby	Yellow	Endemic
	Asteraceae	Aldama revoluta (Meyen) E.E. Schill. Et Panero	III-VII	Shrubby	Yellow	Endemic
	Fitolacaceae	Anisomeria coriacea D.Don	IV-VI	Shrubby	reddish	Endemic
	Fitolacaceae	Anisomeria littoralis (Poepp. et Endl.) Moq.	II-VII	Shrubby	Yellow-reddish	Endemic
	Salicaceae	Azara dentata Ruiz et Pav.	R.M., IX	Shrubby	Yellow	Endemic
	Salicaceae	Azara serrata Ruiz et Pav.	V, X	Shrubby	Yellow-Orange	Endemic
	Asteraceae	Baccharis linearis (Ruiz et Pav.) Pers.	III-X	Shrubby	White-Ivory
	Asteraceae	Baccharis macraei Hook. et Arn.	V	Shrubby		Endemic
	Asteraceae	Baccharis vernalis F.H. Hellwig	V	Shrubby		Endemic
	Asteraceae	Bahia ambrosioides Lag.	II-VIII, J.F.	Shrubby	White- Yellow centre	Endemic
	Berberidaceae	Berberis actinicantha Mart.	V, R.M.	Shrubby	Yellow	Endemic
	Berberidaceae	Berberis chilensis Gillies ex Hook.	V-VII	Shrubby	Yellow	Endemic
	Berberidaceae	Berberis empetrifolia Lam.	IV-XII	Shrubby	Yellow	Non-endemic
	Berberidaceae	Berberis montana Gay	V-X	Shrubby	Yellow	Non-endemic
	Sapindaceae	Bridgesia incisifolia Bert. ex Cambess	III-R.M.	Shrubby	pink	Endemic
	Buddlejaceae	Buddleja globosa Hope	IV-X	Shrubby	Yellow	Non-endemic
	Calceolariaceae	Calceolaria Adscendens Murr.	V-X	SubShrub	golden yellow	Endemic
	Calceolariaceae	Calceolaria Polifolia Hook.	IV-R.M.	SubShrub	Yellow	Endemic
	Calceolariaceae	Calceolaria thyrsiflora Graham	V-VII	SubShrub	intense yellow	Endemic
	Asteraceae	Centaurea chilensis Hook. et Arn.	III-VI	SubShrub	White	Endemic
	Asteraceae	Chuquiraga oppositifolia D.Don	IV-VII	Shrubby	Yellow	Non-endemic
	Lamiaceae	Clinopodium chilensis (Benth.) Govaerts	IV-IX	Shrubby	Blue-Purple	Endemic
	Rhamnaceae	Colletia hystrix Clos	III-XI	Shrubby	White-pink	Non-endemic
	Rhamnaceae	Colletia ulicina Gillies et Hook.	VI-VII	Shrubby	red-pink	Endemic
	Euforbiaceae	Colliguaja integerrima Gillies et Hook.	IV-XII	Shrubby	Yellow-reddish	Non-endemic
	Euforbiaceae	Colliguaja odorifera Molina	IV-VII	Shrubby	Yellow-reddish	Endemic
	Euforbiaceae	Colliguaja salicifolia Gillies et Hook.	R.M.-XII	Shrubby	Yellow-reddish	Endemic
	Poaceae	Cortaderia rudiuscula Stapf	III-VII	Shrubby	White-greenish	Non-endemic
	Malvaceae	Corynabutilon ceratocarpum (Hook. et Arn) Kearney	V-R.M., VI	Shrubby	pink-Purple	Endemic
	Verbenaceae	Diostea Juncea (Gillies et Hook.) Miers	V-X	Shrubby	pink-lavender	Non-endemic
	Rhamnaceae	Discaria chacaye (G.Don) Tortosa	V-XII	Shrubby	White	Non-endemic
	Efedraceae	Ephedra chilensis C.Presl.	II-IX	Shrubby-creeping	Yellow	Non-endemic
	Apiaceae	Eryngium paniculatum Cav. et Dombey ex F. Delaroche	IV-X	Shrubby	White	Non-endemic
	Escalloniaceae	Escallonia illinita C.Presl.	IV-VIII	Shrubby-creeping	White	Endemic
	Escalloniaceae	Escallonia pulverulenta (Ruiz et Pav.) Pers.	IV-XI	Arboreal	White	Endemic
	Escalloniaceae	Escallonia rubra (Ruiz et Pav.) Pers.	IV-XII	Shrubby	Red	Endemic
	Asteraceae	Eupatorium glechonophyllum Less.	III-VII	Shrubby	White	Endemic
	Asteraceae	Eupatorium salvium Colla	IV-VII	Shrubby	Pink-Purple	Endemic
	Solanaceae	Fabiana imbricata Ruiz et Pav.	III-X	Shrubby	White-Sky blues	Non-endemic
	Asteraceae	Flourensia thurifera (Molina) DC.	IV-VI	Shrubby	Yellow	Endemic
	Onagraceae	Fuchsia lycioides Andrews	IV-V	Shrubby	pink dark	Endemic
	Onagraceae	Fuchsia magellanica Lam.	V-XII	Shrubby	Red/Purple petals	Non-endemic
	Verbenaceae	Glandularia laciniata (L.) Schnack et Covas	V-IX	Shrubby-creeping	Yellow	Endemic
	Verbenaceae	Glandularia porrigens (Phil.) J.M.Watson et A.Hoffm.	III-V	Shrubby-creeping	White	Endemic
	Verbenaceae	Glandularia sulphurea (D.Don) Schnack et Covas	III-X	Shrubby-creeping	pink	Endemic
	Asteraceae	Gochnatia foliolosa D.Don	IV-X	Shrubby	White-bluish/White-pink	Endemic
	Sapindaceae	Guindilia trinervis Gillies ex Hook. et Arn.	IV-VIII	Shrubby	Yellow	Non-endemic
	Asteraceae	Haplopappus foliosus DC.	IV-VII	Subshrubby	Yellow	Endemic
	Asteraceae	Haplopappus macrocephalus (Poepp. ex Less.) DC.	IV-IX	Shrubby	red ligulate, pink centres	Endemic
	Asteraceae	Haplopappus uncinatus Phil.	IV-VII	Shrubby	Yellow	Endemic
	Verbenaceae	Junellia lavandulifolia (Phil.) Moldenke	IV-VII	Shrubby	White	Endemic
	Verbenaceae	Junellia spathulata (Gillies ex Hook. et Arn.) Moldenke	IV-VII	Shrubby	Purple	Non-endemic
	Zigofilaceae	Larrea nitida Cav.	III-R.M.	Shrubby	Golden yellow	Non-endemic
	Lamiaceae	Lepechinia chamaedryioides (Balb.) Epling	V-X	Shrubby	sky blue greyish	Endemic
	Lamiaceae	Lepechinia salviae (Lindl.) Epling	IV-R.M.	Shrubby	Blue Purple	Endemic
	Campanulaceae	Lobelia excelsa Bonpl.	IV-VII	Shrubby	red-Orange	Endemic
	Campanulaceae	Lobelia polyphylla Hook. et Arn.	III-R.M.	Shrubby	Purple	Endemic
	Campanulaceae	Lobelia tupa L.	V-X	Shrubby	red	Endemic
	Mirtaceae	Luma chequen (Molina) A. Gray	IV-X	Shrubby-arboreal	White	Endemic
	Solanaceae	Lycium chilense Miers ex A. DC.	IV-VII	Shrubby	White edge- Blue-Purple centre
	Sapindaceae	Llagunoa glandulosa (Hook. et Arn.) G.Don	II-R.M.	Shrubby	greenish	Endemic
	Malesherbiaceae	Malesherbia fasciculata D. Don	IV-VI	Shrubby	White-pink or cream	Endemic
	Rosaceae	Margyricarpus pinnatus (Lam.) Kuntze	IV-VIII	Shrubby	Red yarn	Non-endemic
	Brassicaceae	Mathewsia Foliosa Hook. et Arn.	IV-V	Shrubby	Ivory	Endemic
	Oleaceae	Menodora linoides Phil	IV-V	Shrubby	Yellow	Endemic
	Poligalaceae	Monnina linearifolia Ruiz et Pav.	IV-IX	Shrubby	Bluecream to Yellow	Non-endemic
	Poligalaceae	Monnina philippiana Chodat	IV-VI	Shrubby	reddish Yellow	Non-endemic
	Poligonaceae	Muehlenbeckia hastulata (Sm.) I.M Johnst.	III-X	Shrubby-creeping	greenish to Purple	Non-endemic
	Mirtaceae	Myrceugenia lanceolata (Juss. ex J. St.-Hil.) Kausel	V-IX	Shrubby	White	Endemic
	Mirtaceae	Myrceugenia obtusa (DC.) O. Berg	V-IX	Shrubby	White	Endemic
	Mirtaceae	Myrceugenia rufa (Colla) Skottsb. ex Kausel	IV-V	Shrubby	White	Endemic
	Solanaceae	Nolana crassulifolia Poepp.	III-V	Shrubby-creeping	White	Endemic
	Solanaceae	Nolana sedifolia Poepp.	I-V	Shrubby-creeping	White	Endemic
	Asteraceae	Podanthus mitiqui Lindl.	IV-VII	Shrubby	Yellow	Endemic
	Sapotaceae	Pouteria splendens (A.DC.) Kuntze	IV-V	Shrubby	White	Endemic
	Asteraceae	Proustia cuneifolia D.Don	IV-VIII	Shrubby	White
	Asteraceae	Proustia cuneifolia	IV-R.M.	Shrubby	reddish	Endemic
	Asteraceae	Proustia ilicifolia Hook et Arn.	III-R.M.	Shrubby	White	Endemic
	Saxifragaceae	Ribes polyanthes Phil.	R.M.	Shrubby	Yellow	Endemic
	Saxifragaceae	Ribes punctatum Ruiz et Pav.	IV-X	Shrubby	Yellow	Non-endemic
	Saxifragaceae	Ribes trilobum Meyen	IV-IX	Shrubby	Yellow	Endemic
	Asteraceae	Senecio adenotrichius DC.	IV-V-R.M.	Subshrubby	Yellow Yellow Orange	Endemic
	Asteraceae	Senecio cerberoanus Remy	III-V	Subshrubby	Yellow Yellow Orange	Endemic
	Asteraceae	Senecio eruciformis J. Remy	IV-VI	Shrubby	Yellow	Non-endemic
	Cesalpinaceae	Senna arnottiana (Gillies ex Hook. Et Arn) H.S. Irwin et Barneby	IV-VIII	Shrubby	Yellow	Endemic
	Cesalpinaceae	Senna candolleana (Vogel) H.S.Irwin et Barneby	IV-V-R.M.	Shrubby	Gold Yellow	Endemic
	Cesalpinaceae	Senna stipulacea (Aiton) H.S.Irwin et Barneby	IV-X, XVI, R.M.	Shrubby	Yellow-Orange	Endemic
	Solanaceae	Solanum crispum Ruiz et Pav	IV-VI	Shrubby	Blue-violet	Endemic
	Solanaceae	Solanum pinnatum Cav.	II-VII	Subshrubby	Blue	Endemic
	Fabaceae	Sphora macrocarpa Sm.	IV-IX	Shrubby	Yellow	Endemic
	Malvaceae	Sphaeralcea obtusiloba (Hook.) G. Don	V-R.M., VI	Shrubby	Blue-violet	Endemic
	Malvaceae	Tarasa umbellata Krapov.	VII	Shrubby	White	Endemic
	Rosaceae	Tetraglochin alatum (Gillies ex Hook. et Arn.) Kuntze	III-VIII	Shrubby	Yellow	Non-endemic
	Lamiaceae	Teucrium bicolor Sm.	IV-IX	Shrubby	white spots Purple/pink	Endemic
	Rhamnaceae	Trevoa quinquenervia Gill. et Hook.	IV-VII	Shrubby-arboreal	Ivory	Endemic
	Vivianiaceae	Viviania crenata (Hook.) G.Don	V, R.M.	Shrubby	White	Endemic
	Vivianiaceae	Viviania marifolia (Hook.) G.Don	III-VI	Shrubby	pink intense yellow	Non-endemic
	Cactaceae	Austrocactus spiniflorus (Phil.) F. Ritter	R.M., VI	Subshrubby	White-yellowish/reddish por fuera	Endemic
	Cactaceae	Cumulopuntia sphaerica (C.F. Först.) E.F. Anderson	I-R.M.	Subshrubby	Intense yellow	Non-endemic
	Cactaceae	Eriosyce aurata (Pfeiff.) Backeb.	III-R.M.	Shrubby	Red	Endemic
	Cactaceae	Eulychnia castanea Phil.	IV-V	Shrubby	White	Endemic
	Cactaceae	Eriosyce subgibbosa (Haw.) Katt.	III-VIII	Shrubby	Pink	Endemic
	Cactaceae	Eriosyce chilensis (Hildm. ex K.Schum.) Katt.	IV, V	Shrubby	Pink	Endemic
	Cactaceae	Eriosyce curvispina (Bertero ex Colla) Katt.	III - VIII, R.M.	Shrubby	Red with Yellow border	Endemic
	Cactaceae	Eriosyce curvispina subsp. tuberisulcata (Jacobi) Katt.	V-VI	Shrubby	Red-yellow or Yellow-brown	Endemic
	Cactaceae	Leucostele chiloensis (Colla) Schlumpb.	IV-VII	Shrubby-arboreal	White	Endemic
Climbing/creeping	Alstroemeriaceae	Bomarea salsilla (L.) Herb.	V-IX	Creeper	Pink intense	Endemic
	Vitaceae	Cissus striata Ruiz et Pav.	IV-X	Creeper	greenish	Non-endemic
	Dioscoreaceae	Dioscorea bryoniifolia Poepp.	IV-V	Creeper	Yellow	Endemic
	Apocinaceae	Diplolepis geminiflora (Decne.) Liede et Rapini	III-IV-V, R.M.	Creeper	White to Purple	Endemic
	Apocinaceae	Diplolepis menziesii Schult. F.	IV-VII	Creeper	Gold Yellow	Endemic
	Bignoniaceae	Eccremocarpus scaber Ruiz et Pav.	V-X	Creeper	red-Orange	Non-endemic
	Fitolacaceae	Ercilla spicata (Bertero) Moq.	V-VIII	Creeper-shrubby	White greenish to pink	Endemic
	Griseliniaceae	Griselinia scandens (Ruiz et Pav.) Taub.	IV-XI	Creeper-shrubby	Red-purplish	Endemic
	Hidrangeaceae	Hydrangea serratifolia (Hook. et Arn.) F. Phil.	V-XI	Creeper	White	Non-endemic
	Philesiaceae	Lapageria rosea Ruiz et Pav.	IV-X	Creeper	Red intense	Endemic
	Lardizabalaceae	Lardizabala biternata Ruiz et Pav.	V-X	Creeper	dark purplish	Endemic
	Fabaceae	Lathyrus magellanicus Lam.	IV-XII	Creeper	Purple-cream	Non-endemic
	Fabaceae	Lathyrus subandinus Phil.	V-IX	Creeper	Blue-Ivory	Endemic
	Asteraceae	Mutisia decurrens Cav.	VI-XI	Creeper	Orange	Non-endemic
	Asteraceae	Mutisia ilicifolia Hook.	IV-VII	Creeper	Pink	Endemic
	Asteraceae	Mutisia latifolia D.Don	V-R.M., VI	Creeper	Pink	Endemic
	Asteraceae	Mutisia rosea Poepp. ex Less.	IV-VIII	Creeper	Yellow-pink	Endemic
	Asteraceae	Mutisia subulata Ruiz et Pav.f.subulata	IV-VIII	Creeper	red	Endemic
	Pasifloraceae	Passiflora pinnatistipula Cav.	V	Creeper	pink-bluish	Non-endemic
	Asteraceae	Proustia pyrifolia DC.	IV-X	Creeper-shrubby	White pink	Endemic
	Loasaceae	Scryphanthus elegans Sweet	IV-IX	Creeper	Yellow escama red	Endemic
	Tropeolaceae	Tropaeolum azureum Bertero ex Colla	II-R.M.	Creeper	Blue	Endemic
	Tropeolaceae	Tropaeolum brachyceras Hook. et Arn.	IV-VII	Creeper	Yellow, Purple	Endemic
	Tropeolaceae	Tropaeolum ciliatum Ruiz et Pav.	V-IX	Creeper	Yellow-Orange	Endemic
	Tropeolaceae	Tropaeolum tricolor Sweet	II-X	Creeper	Varied colors	Endemic
	Apocinaceae	Tweedia birostrata (Hook.et Arn.) Hook. et Arn	II-VIII	Creeper	Pink interior, Purple exterior	Endemic
	Fabaceae	Vicia nigricans Hook. et Arn.	V-VI	Creeper	Yellow	Non-endemic
	Fabaceae	Vicia vicina Clos	I, IX	Creeper	Sky blue	Endemic
Herbaceous	Escrofulariaceae	Alonsoa meridionalis (L.f) Kuntze	IV-VIII	Herb	Red-Orange	Non-endemic
	Alstroemeriaceae	Alstroemeria angustifolia Herb	IV-VI	Rhizomatous herb	Pink	Endemic
	Alstroemeriaceae	Alstroemeria hookeri Lodd.	IV,V, VII,VIII, XVIVII-VIII	Rhizomatous herb	pink- White base	Endemic
	Alstroemeriaceae	Alstroemeria ligtu L.	V-IX, XVI, R.M	Rhizomatous herb	Pink	Endemic
	Alstroemeriaceae	Alstroemeria pelegrina L.	IV-V	Rhizomatous herb	Pink	Endemic
	Alstroemeriaceae	Alstroemeria pseudospathulata Bayer	VII-VIII	Rhizomatous herb	Gold yellow	Non-endemic
	Alstroemeriaceae	Alstroemeria spathulata C.Presl.	V	Rhizomatous herb	pink	Endemic
	Alstroemeriaceae	Alstroemeria umbellata Meyen	R.M., VI	Rhizomatous herb	pink	Endemic
	Alstroemeriaceae	Alstroemeria pulchra Sims	IV-V, R.M.	Rhizomatous herb	White	Endemic
	Alstroemeriaceae	Alstroemeria revoluta Ruiz et Pav.	IV-VII	Rhizomatous herb	pink to Purple	Endemic
	Alstroemeriaceae	Alstroemeria versicolor Ruiz et Pav.	R.M.-IX	Rhizomatous herb	brown-Orange or Green Yellow	Endemic
	Ranunculaceae	Anemone decapetala Ard.	IV-XII	Rhizomatous herb	White- lilac	Non-endemic
	Papaveraceae	Argemone hunnemannii Otto et A. Dietr.	II-VII	Herb	White	Non-endemic
	Aristoloquiaceae	Aristolochia chilensis Bridges ex Lindl.	III-R.M.	Creeping herb	Purple	Endemic
	Plumbaginaceae	Armeria maritima (Mill.) Willd.	IV-XII	Herb	White to pink	Non-endemic
	Fabaceae	Astragalus amatus Clos	IV-XII	Creeping herb	white with Purple	Non-endemic
	Montiaceae	Calandrinia affinis Gillies ex Arn.	IV-VII	Herb	White to pale pink	Non-endemic
	Montiaceae	Calandrinia colchaguensis Barneoud	VI-X	Herb	Fuscia-pink or white	Non-endemic
	Calceolariaceae	Calceolaria corymbosa Ruiz et Pav.	IV-X	Herb	Yellow	Endemic
	Calceolariaceae	Calceolaria glandulosa Benth.	II-VII	Herb	brown-Orange or green yellow	Endemic
	Calceolariaceae	Calceolaria nudicaulis Benth.	V-R.M., VI	Herb	Yellow	Endemic
	Calceolariaceae	Calceolaria arachnoidea Graham	III-VII	Herb	Dark Purple	Endemic
	Calceolariaceae	Calceolaria cana Cav.	IV-IX	Herb	pink or pale Purple	Endemic
	Calceolariaceae	Calceolaria purpurea Graham	V-R.M., VI	Herb	Red-Purple	Endemic
	Iridaceae	Calydorea xiphioides (Poepp.) Esp.	IV-V	Herb	Blue	Endemic
	Aizoaceae	Carpobrotus chilensis (Molina) N.B Er.	II-IX	Herb	Pink-Fuchsia-White or ivory	Endemic
	Asteraceae	Chaetanthera chilensis (Willd.) DC.	IV-IX	Herb	Yellow	Endemic
	Asteraceae	Chaetanthera flabellata D.Don.	R.M.-VII	Herb	Yellow	Endemic
	Asteraceae	Chaetanthera microphylla (Cass.) Hook et Aarn.	V-VIII	Herb	Red	Endemic
	Montiaceae	Cistanthe grandiflora (Lindl.) Schltdl.	IV-VIII	Herb	Pink-Fuchsia	Endemic
	Onagraceae	Clarkia tenella F.H.Lewis et M.R.Lewis	IV-X	Herb	Purple or Red- White	Endemic
	Polemoniaceae	Collomia biflora (Ruiz et Pav.) Brand	V-XII	Herb	Red to cream	Non-endemic
	Tecofilaceae	Conanthera bifolia Ruiz et Pav.	V-IX	Herb	Blue to white	Endemic
	Tecofilaceae	Conanthera campanulata (D.Don) Lindl.	I-IX	Herb	Blue-Purple to white	Endemic
	Tecofilaceae	Conanthera parvula (Phil.) M.Muñoz	V-IX	Herb	White with veins, blue points	Endemic
	Tecofilaceae	Conanthera Trimaculata (D.Don) Meigen	V-VIII	Herb	Purple spot on tepals	Endemic
	Francoaceae	Francoa appendiculata Cav.	V-X	Rhizomatous herb	White or Pink-purplish	Endemic
	Geraniaceae	Geranium berteroanum Colla	IV-XII	Herb	Purple or violet	Non-endemic
	Rosaceae	Geum magellanicum Comm. ex Pers.	VI-XII	Herb	Red to yellow	Non-endemic
	Asteraceae	Gnaphalium cheiranthifolium Bertero	IV-X	Herb	Yellow	Non-endemic
	Asteraceae	Gnaphalium viravira Molina	IV-VIII	Herb	Yellow	Endemic
	Gunneraceae	Gunnera tinctoria (Molina) Mirb.	IV-XII	Rhizomatous herb	Reddish	Non-endemic
	Asteraceae	Helenium aromaticum (Hook.) Bailey	IV-VII	Herb	Yellow	Endemic
	Iridaceae	Herbertia lahue (Molina) Goldblatt	V-X	Herb	Sky blue, white	Non-endemic
	Apiaceae	Homalocarpus dichotomus (Poepp.ex DC.) Mathias et Constance	III-VI	Herb	White- pink or violet	Endemic
	Asteraceae	Hypochaeris scorzonerae (DC.) Muell.	III-VI	Herb	Yellow- Purple	Endemic
	Asteraceae	Leucheria cerberoana Remy	III-VI	Herb	White	Endemic
	Asteraceae	Leucheria glandulosa D.Don	V-VIII	Herb	Pink	Endemic
	Alliaceae	Leucocoryne coquimbesis F.Phil	IV-V	Herb	Sky blue or White	Endemic
	Alliaceae	Leucocoryne ixioides (Hook.) Lindl.	IV-VIII	Herb	White or Purple	Endemic
	Alliaceae	Leucocoryne violacescens Phil.	IV-R.M.	Herb	Purple or violet	Endemic
	Alliaceae	Leucocoryne vittata Ravenna	IV-V	Herb	Purple-Blue or White	Endemic
	Iridaceae	Libertia sessiliflora (Poepp.) Skottsb.	V-VIII	Rhizomatous herb	Sky blue- dark blue- yellow centre	Endemic
	Linaceae	Linum macraei Benth	IV-VIII	Herb	Yellow boton Reddish	Endemic
	Fabaceae	Lupinus microcarpus Sims	I-X	Herb	Purple-Blueo morado
	Malesherbiaceae	Malesherbia linearifolia (Cav.) Pers.	II-IX	Herb	Sky blue-Bluees-pink-reddish	Endemic
	Brassicaceae	Menonvillea linearis DC.	IV-VIII, R.M.	Herb	Whiteivory	Endemic
	Escrofulariaceae	Mimulus cupreus Dombrain	VI-IX	Herb	Red	Non-endemic
	Escrofulariaceae	Mimulus luteus L.	III-XI	Herb	Yellow with red spots	Non-endemic
	Escrofulariaceae	Mimulus naiandinus J.Watson et A.Flores	VI	Herb	Pink with white	Endemic
	Montiaceae	Montiopsis sericea (Hook. et Arn.) D.I.Ford	IV-R.M.	Herb	Fuchsia dark	Endemic
	Asteraceae	Moscharia pinnatifida Ruiz. et Pav.	IV-VII	Herb	Whites	Endemic
	Solanaceae	Nicotiana acuminata (Graham) Hook.	II-VIII	Herb	White-greenish	Non-endemic
	Solanaceae	Nolana paradoxa Lindl.	IV-X	Creeping herb	Blue	Endemic
	Alliaceae	Nothoscordum gramineum (Sms) Beauverd	V-X	Herb	White, yellow, Purple	Non-endemic
	Onagraceae	Oenothera acaulis Cav.	IV-X	Creeping herb	White	Endemic
	Onagraceae	Oenothera picensis Phil.	IV-X	Herb	Yellow	Non-endemic
	Onagraceae	Oenothera stricta Ledeb.	IV-X	Herb	Yellow	Non-endemic
	Iridaceae	Olsynium junceum (E.Mey. ex Presl)	III-XII	Rhizomatous herb	pink-lilacs or White	Non-endemic
	Iridaceae	Olsynium philippii (Klatt) Goldblatt	IV-VI	Rhizomatous herb	pink or Whites	Endemic
	Iridaceae	Olsynium scirpoideum (Poepp.) Goldblatt	I-IX	Rhizomatous herb	pink or White	Endemic
	Oxalidaceae	Oxalis megalorrhiza Jacq.	I-VIII	Herb	Yellow	Endemic
	Oxalidaceae	Oxalis perdicaria (Molina) Bertero	IV-X	Herb	Yellow	Non-endemic
	Oxalidaceae	Oxalis arenaria Bertero ex Colla	IV-XII	Herb	pink	Endemic
	Oxalidaceae	Oxalis rosea Jacq.	IV-XI	Herb	pink	Endemic
	Oxalidaceae	Oxalis squamata Zucc.	V-VIII	Herb	pink	Non-endemic
	Hyacinthaceae	Oziroe arida (Poepp.) Speta	IV-IX	Herb	White	Endemic
	Hemerocallidaces	Pasithea caerulea (Ruiz et Pav.) D.Don	II-X	Herb	Blue	Non-endemic
	Asteraceae	Perezia carthamoides (D.Don) Hook. et Arn.	IV-VIII	Herb	White or Yellow	Non-endemic
	Hidrofilaceae	Phacelia brachyantha Benth.	IV-VI	Herb	Blue-violet	Non-endemic
	Hidrofilaceae	Phacelia secunda J.M.Gmel.	I-XVI, R.M.	Herb	Whites-Blueviolet	Non-endemic
	Amarilidaceae	Phycella cyrtanthoides (Sims) Lindl.	IV-IX	Herb	Red or Yellow	Endemic
	Amarilidaceae	Placea amoena Phil.	IV	Herb	Red-Purple	Endemic
	Amarilidaceae	Placea arzae Phil.	R.M.	Herb	White lines Purples	Endemic
	Amarilidaceae	Placea ornata Miers ex Lindl.	V	Herb	White lines Purples	Endemic
	Asteraceae	Polyachyrus poeppigii (Kunze ex Less.) Less.	II-VIII	Herb	Pink pale-White	Endemic
	Schoepfiaceae	Quinchamalium chilense Molina	I-XI	Herb	Yellow reddish	Non-endemic
	Ranunculaceae	Ranunculus chilensis DC.	IV-X	Herb	Yellow	Non-endemic
	Ranunculaceae	Ranunculus peduncularis Sm.	IV-XII	Herb	Yellow	Non-endemic
	Amarilidaceae	Rhodophiala advena (Ker-Gawl.) Traub	IV-V	Herb	Red-Pink to Yellow	Endemic
	Amarilidaceae	Rhodolirium montanum Phil.	IV-VI	Herb	Pink-ivory	Non-endemic
	Solanaceae	Salpiglossis sinuata Ruiz. et Pav.	IV-IX	Herb	White-red-blue- yellow	Non-endemic
	Solanaceae	Schizanthus grahamii Gillies ex Hook.	VVII, R.M.	Herb	Purple-Yellow	Non-endemic
	Solanaceae	Schizanthus hookeri Gillies ex Graham	IV-IX	Herb	Purple-Yellow	Non-endemic
	Solanaceae	Schizanthus litoralis Phil.	IV-V	Herb	Violet	Endemic
	Solanaceae	Schizanthus pinnatus Ruiz et Pav.	IV-X	Herb	White-pink to pale violet	Endemic
	Solanaceae	Schizanthus tricolor Grau et Gronbach	V-R.M.	Herb	White-pink to pale violet	Endemic
	Brassicaceae	Schizopetalon walkeri Hook.	IV-V	Herb	White	Endemic
	Asteraceae	Senecio fistulosus Poepp. ex Less.	V-XII	Rhizomatous herb	Yellow	Non-endemic
	Iridaceae	Sisyrinchium arenarium Poepp.	IV-XII	Rhizomatous herb	Yellow- greyish-brown lines	Non-endemic
	Iridaceae	Sisyrinchium Graminifolium Lindl.	II-IX	Rhizomatous herb	Yellow	Non-endemic
	Iridaceae	Sisyrinchium striatum Sm.	IV-IX	Rhizomatous herb	Yellow	Non-endemic
	Iridaceae	Sisyrinchium azureum Phil.	IV-XII	Rhizomatous herb	Blue	Non-endemic
	Solanaceae	Solanum maglia Schlecht.	IV-VII	Herb	White	Non-endemic
	Iridaceae	Solenomelus pedunculatus (Gillies ex Hook.) Hocht.	IV-VIII	Herb	Yellow	Endemic
	Iridaceae	Solenomelus segethii (Phil.) Kuntze	V-VII	Rhizomatous herb	Blue	Non-endemic
	Asteraceae	Solidago chilensis Meyen	I-X	Rhizomatous herb	Yellow	Non-endemic
	Lamiaceae	Stachys albicaulis Lindl.	V-IX	Herb	Dark pink	Non-endemic
	Lamiaceae	Stachys grandidentata Lindl.	II-X	Herb	Red with white	Endemic
	Lamiaceae	Stachys philippiana Vatke	IV-R.M.	Herb	Red	Endemic
	Escrofulariaceae	Stemodia durantifolia (L.) Sw.	II-IX	Herb	Blue	Endemic
	Acantaceae	Stenandrium dulce (Cav.) Nees	IV-IX	Rhizomatous herb	Pink	Non-endemic
	Tecofilaceae	Tecophilaea violiflora Bertero ex Colla	IV-V, R.M.	Herb	Blue	Endemic
	Amarilidaceae	Traubia modesta (Phil.) Ravenna	IV-VI	Herb	White with Purple line	Endemic
	Asteraceae	Trichocline aurea (D.Don) Reiche	IV-IX	Herb	Yellow	Endemic
	Laxmanniaceae	Trichopetalon plumosum (Ruiz et Pav.) J.F. Macbr.	IV-IX	Herb	White	Endemic
	Asteraceae	Triptilion gibbosum Ruiz et Pav.	IV-VI	Herb	White	Endemic
	Asteraceae	Triptilion spinosum Ruiz et Pav.	V-X	Herb	Blue-blue	Endemic
	Tropaeolaceae	Tropaeolum polyphyllum Cav.	VII-VIII	Creeping herb	Yellow-Orange	Endemic
	Tropaeolaceae	Tropaeolum sessilifolium Poepp. et Endl.	IV-VI	Herb	Red-purplish pale- pink or Yellow	Endemic
	Valerianaceae	Valeriana papila Bertero ex DC.	IV-VI	Herb	Pink	Endemic
	Valerianaceae	Valeriana stricta Clos.	III-VII	Herb	Yellow	Non-endemic
	Verbenaceae	Verbena litoralis Kunth	IV-VI	Herb	Pale violet	Non-endemic
	Bromeliaceae	Ochagavia litoralis (Phil.) Zizka- Trumpler & Zöllner	IV-VI	Herb	Pink	Endemic
	Bromeliaceae	Puya alpestris (Poepp.) Gay	IV-IX	Herb	Blue - Bluegreenish- Bluedark	Endemic
	Bromeliaceae	Puya chilensis Molina	IV-VIII	Herb	Yellow	Endemic
	Bromeliaceae	Pitcairnia coerulea (Lindl.) Benth. & Hook.f.	IV-VI	Herb	Dark blue	Endemic
	Bromeliaceae	Puya venusta Phil.	IV-V	Herb	Blue or white	Endemic
	Orquidaceae	Bipinnula fimbriata (Poepp.) I.M.Johnst.	IV-V, R.M.	Herb	White- greenish	Endemic
	Orquidaceae	Bipinnula plumosa Lindl.	IV-VI, R.M.	Herb	White- greenish	Endemic
	Orquidaceae	Chloraea alpina Poepp.	R.M.-XI	Herb	Yellow	Non-endemic
	Orquidaceae	Chloraea berteroana Kraenzlin	VI-IX	Herb	White	Endemic
	Orquidaceae	Chloraea bletioides Lindl.	V-VII, XV	Herb	White	Endemic
	Orquidaceae	Chloraea chrysantha Poepp.	IV-VIII, XVI	Herb	Gold Yellow	Endemic
	Orquidaceae	Chloraea disoides Lindl.	V-IX	Herb	Yellow	Endemic
	Orquidaceae	Chloraea galeata Lindl.	VI-IX	Herb	White	Endemic
	Orquidaceae	Chloraea heteroglossa Rchb. f.	V	Herb	Yellow-Ivory	Endemic
	Orquidaceae	Correorchis cylindrostachya (Poepp.) Szlach.	V-IX, XVI	Herb	Green	Non-endemic
	Orquidaceae	Gavilea chica (Speg. Et Kraenzl.) Chemisquy	IV-XII, XVI	Herb	White	Non-endemic
	Orquidaceae	Gavilea glandulifera (Poepp.) M.N. Correa	IV-XII, XVI	Herb	White	Non-endemic
	Orquidaceae	Gavilea longibracteata (Lindl.) Spare ex L.E.Navas	IV-XII, XVI	Herb	White	Endemic
	Orquidaceae	Gavilea platyantha (Rchb.f.) Ormd.	IV-V	Herb	White	Non-endemic
	Orquidaceae	Odontorrhynchus domeykoanus Szlach.	IV-X, XIV, XVI	Herb	White-Ivory	Non-endemic
Fern	Adiantaceae	Adiantum chilense Kaulf.	V-XII	Creeping rhizome-fern		Non-endemic
	Adiantaceae	Adiantum glanduliferum Link.	II-VIII	Fern		Non-endemic
	Adiantaceae	Adiantum sulphureum Kaulf.	IV-IX	Fern		Non-endemic
	Blechnaceae	Blechnum chilense (Kaulf.) Mett.	IV-XII, J.F	Fern		Non-endemic
	Blechnaceae	Blechnum hastatum Kaulf.	IV-X	Fern		Non-endemic
	Adiantaceae	Cheilanthes glauca (Cav.) Mett.	IV-X	Creeping rhizome-fern		Non-endemic
	Woodsiaceae	Cystopteris fragilis (L.) Bernh.	I-XII	Creeping rhizome-fern		Non-endemic
	Denstaedtiaceae	Dennstaedtia glauca (Cav.) C. Chr. ex Losser	IV-VII	Creeping rhizome-fern		Non-endemic
	Telipteridaceae	Thelypteris argentina (Hieron.) Abbiatti	I-VIII	Creeping rhizome-fern		Non-endemic

## Sheet: South
Table S2. List of endemic and non-endemic Chilean species selected according to their ornamental value.
Growth habit	Family	Scientific name	Distribution	Growth habit (details)	Flower Color	Endemic/Non-endemic
Tree	Aextoxicaceae	Aextoxicon punctatum R. et P.	IV-X	Arboreal		Endemic
	Mirtaceae	Amomyrtus luma (Mol.) Legr. Et Kaus.	VII-IX	Arboreal	White	Endemic
	Mirtaceae	Amomyrtus meli (Phil.) Legr. Et kaus.	VIII-X	Arboreal	White	Endemic
	Araucariaceae	Araucaria araucana (Mol.) K.Koch	VIII-IX	Arboreal	brown	Endemic
	Eleocarpaceae	Aristotelia chilensis (Mol.) Stuntz	IV-XI (JF)	Arboreal-shrubby	Yellow	Endemic
	Cupresaceae	Austrocedrus chilensis (D.Don) Pic. Ser. et Bizz.	V-XI	Arboreal		Endemic
	Mirtaceae	Blepharocalyz cruckshanksii (H. et A.) Nied.	V-XI	Arboreal	White	Endemic
	Cunoniaceae	Caldcluvia paniculata (Cav.) D.Don	VIII-XI	Arboreal	White	Endemic
	Icacinaceae	Citronella mucronata (R.et.P) D.Don	IV-X	Arboreal	White-yellowish	Endemic
	Eleocarpaceae	Crinodendron hookerianum Gay	IX, X, XIV	Arboreal	red	Endemic
	Lauraceae	Cryptocarya alba (Mol.) Looser	IV-X	Arboreal	greenish	Endemic
	Asteraceae	Dasyphyllum diacanthoides (Less.) Cabr	VII-X, XVI, XIV	Arboreal	White	Non-endemic
	Winteraceae	Drimys winteri J.R et G. Forster	IV-XII	Arboreal	White	Endemic
	Proteaceae	Embothrium coccineum J.R. et G. Forster.	VII-XII	Arboreal	red	Endemic
	Escaloniaceae	Escallonia revoluta (R. et P.) Pers.	IV-X	Arboreal	White or pink	Endemic
	Eucrifiaceae	Eucryphia cordifolia Cav.	VIII-X	Arboreal	White	Endemic
	Eucrifiaceae	Eucryphia glutinosa (Poepp. et Endl.) Bailon	VII-IX	Arboreal	White	Endemic
	Cupresaceae	Fitzroya cupressoides (Mol.) Johnst.	XIV, X	Arboreal		Non-endemic
	Proteaceae	Gevuina avellana Mol.	VII-XI	Arboreal	White	Endemic
	Gomortegaceae	Gomortega keule (Mol.) Baillon	VII-VIII	Arboreal	Yellow-greenish	Endemic
	Monimiaceae	Laureliopsis philippiana (Looser) Schoddle	VIII-XI	Arboreal	Yellow-greenish	Endemic
	Monimiaceae	Laurelia sempervirens (R. et P.) Tul.	VI-X	Arboreal		Endemic
	Proteaceae	Lomatia dentata (R. et P.) R. Br.	IV-X	Arboreal-shrubby	White	Endemic
	Proteaceae	Lomatia ferruginea (Cav.) R. Br.	VII-XII	Arboreal	Yellow-Orange or reddish	Endemic
	Proteaceae	Lomatia hirsuta (Lam.) Diels ex Macbr.	IV-X	Arboreal	cream	Non-endemic
	Mirtaceae	Luma apiculata (DC.) Burret	V-XI	Arboreal	White	Endemic
	Celastraceae	Maytenus boaria Mol.	III-X	Arboreal	Green-yellowish	Non-endemic
	Celastraceae	Maytenus magellanica (Lam.) Hook. F	VIII-XII	Arboreal-shrubby	reds	Endemic
	Mirtaceae	Myrceugenia planipes (H. et A.) Berg	VIII-XI	Arboreal-shrubby	White	Endemic
	Fagaceae	Nothofagus alessandrii Espinosa	VIII	Arboreal		Endemic
	Fagaceae	Nothofagus alpina (P.et E.) Oerst.	VII-X	Arboreal		Endemic
	Fagaceae	Nothofagus antarctica (G. Forst.) Oerst.	VII-XII	Arboreal-shrubby		Endemic
	Fagaceae	Nothofagus betuloides (Mirb.) Oerst.	X-XII	Arboreal		Endemic
	Fagaceae	Nothofagus dombeyi (Mirb.) Oerst-	VI-XI	Arboreal		Endemic
	Fagaceae	Nothofagus nitida (Phil.) Krasser	X-XI	Arboreal		Endemic
	Fagaceae	Nothofagus obliqua (Mirb.) Oerst.	VI-X	Arboreal		Endemic
	Fagaceae	Nothofagus pumilio (Poepp. Et Endl.)	VII-XII	Arboreal		Endemic
	Lauraceae	Persea lingue (R. et P.) Nees ex Kopp	V-X	Arboreal	Yellow	Endemic
	Monimiaceae	Peumus boldus Mol.	IV-X	Arboreal	White	Endemic
	Rutaceae	Pitavia punctata (R. et P.) Mol.	VII-VIII	Arboreal	White	Endemic
	Podocarpaceae	Podocarpus nubigena Lindl.	IX-XII	Arboreal		Endemic
	Podocarpaceae	Podocarpus saligna D.Don	VII-X	Arboreal	Solitaria	Endemic
	Podocarpaceae	Prumnopitys andina (P. et E.) de Laub.	VII-X	Arboreal		Endemic
	Araliaceae	Pseudopanax laetevirens (Gay) Franchet	VII-XII	Arboreal-shrubby	Yellow-greenish	Endemic
	Verbenaceae	Rhaphithamnus spinosus (A. L. Juss.) Mold.	IV-XI	Arboreal	violet	Endemic
	Podocarpaceae	Saxegothaea conspicua Lindl.	VII-XI	Arboreal		Endemic
	Papilonaceae	Sophora cassioides (F. Phil) Sparre	VII-XI	Arboreal	Yellow	Endemic
	Mirtaceae	Tepualia stipularis (H. et A.) Griseb.	VII-XII	Arboreal	White	Endemic
	Cunoniaceae	Weinmannia trichosperma Cav.	VII-XII	Arboreal	White-cream	Endemic
Shrub	Papilionaceae	Adesmia concinna Phil.	IX	Shrubby	Yellow	Endemic
	Papilionaceae	Adesmia corymbosa Clos	R.M.-XII	Subshrub	Yellow pale to reddish	Non-endemic
	Papilionaceae	Adesmia emarginata Clos	X-XII	Subshrub	Yellow-line brown reddish	Non-endemic
	Flacourtaceae	Azara alpina Poepp. Et Endl.	VIII-X	Shrubby	Yellow-lemon	Non-endemic
	Flacourtaceae	Azara integrifolia R. et P.	V-X	Shrubby	Yellow intense yellow	Endemic
	Flacourtaceae	Azara lanceolata Hook. f.	VIII-XII	Shrubby	Yellow	Non-endemic
	Flacourtaceae	Azara microphylla Hook. f.	VII-X	Shrubby		Non-endemic
	Asteraceae	Baccharis magellanica (Lam.) Pers.	XII	Shrubby		Non-endemic
	Asteraceae	Baccharis neaei DC.	R.M.-XII	Shrubby		Non-endemic
	Asteraceae	Baccharis sagittalis (Less.) DC.	IV-IX	Shrubby		Non-endemic
	Asteraceae	Baccharis patagonica H. et A.	VII-XII	Shrubby		Non-endemic
	Asteraceae	Baccharis racemosa (R. et P.) DC.	R.M.-XI	Shrubby		Non-endemic
	Asteraceae	Baccharis rhomboidalis Remy	R.M.-X	Shrubby		Endemic
	Asteraceae	Baccharis sphaerocephala H. et A.	VII-X	Shrubby	White cream	Non-endemic
	Berberidaceae	Berberis congestiflora Gay	IX-X	Shrubby	Yellow-Orange	Endemic
	Berberidaceae	Berberis darwinii Hook	VIII-XII	Shrubby	Yellow-Orange	Non-endemic
	Berberidaceae	Berberis microphylla G. Forst.	VII-XII	Shrubby	Yellow-gold	Non-endemic
	Berberidaceae	Berberis negeriana Tischler	VIII-X	Shrubby	Yellow clara	Endemic
	Berberidaceae	Berberis serrato-dentata Lechler	X	Shrubby	Yellow-aurea	Non-endemic
	Berberidaceae	Berberis trigona Kunze ex Poepp. Et Phil	IX-XII	Shrubby	Orange	Non-endemic
	Coriariaceae	Coriaria ruscifolia L.	VII-XI	Shrubby	Petalo Bluedark	Non-endemic
	Gramineae	Cortaderia araucana Stapf	VI-XI, XIV, XVI, R.M.	Shrubby	Ivory-purplish	Non-endemic
	Malvaceae	Corynabutilon ochseni (Phil.) Kearney	X	Shrubby	pink-Purple	Endemic
	Malvaceae	Corynabutilon vitifolium (Cav.) Kearney	IX-X	Shrubby	White to White bluish	Endemic
	Asteraceae	Chiliotrichum rosmarinifolium Less.	VII-XII	Shrubby	White, Yellow	Non-endemic
	Gramíneas	Chusquea culeou Desv	VII-XI	Shrubby	Purplish	Non-endemic
	Gramíneas	Chusquea macrostachya Phil.	X-XI	Shrubby	Purplish	Endemic
	Gramíneas	Chusquea quila Kunth	VI-XI, XIV, XVI	Shrubby		Endemic
	Desfontainaceae	Desfontainia spinosa R. et P.	VII-XII	Shrubby	red-apice Yellow	Non-endemic
	Winteraceae	Drimys andina (Reiche) R. A. Rodr. Et	IX-X	Shrubby	White	Endemic
	Empetraceae	Empetrum rubrum Vahl ex Willd.	IX-XII (VII, J.F)	Shrubby	reddish	Non-endemic
	Escaloniaceae	Escallonia alpina Poepp. ex DC.	R.M.-XII	Shrubby	red-pink-White	Non-endemic
	Escaloniaceae	Escallonia leucantha Remy	IV-X	Shrubby	White	Non-endemic
	Escaloniaceae	Escallonian rosea Griseb.	IX-XII	Shrubby	White or pink	Non-endemic
	Escaloniaceae	Escallonia virgata (R. et P.) Pers	VII-XII	Shrubby	Pale pink	Non-endemic
	Onagraceae	Fuchsia magellanica Lam.	IV-XII	Shrubby	Red sepals- Purple petals	Non-endemic
	Ericaceae	Gaultheria insana (Mol.) A. Middleton	VII-XI	Shrubby	White	Non-endemic
	Ericaceae	Gaultheria phillyreifolia (Pers.) Sleumer	VII-XII	Shrubby	White	Non-endemic
	Ericaceae	Gaultheria pumila (L.f) Middleton	VI-X	Shrubby	White	Non-endemic
	Ericaceae	Gaultheria Mucronata (L. f) H. et A.	IX-XII	Shrubby	White	Non-endemic
	Cornaceae	Griselinia jodinifolia (Griseb.) Taub.	VII-X	Shrubby	petals yellow	Endemic
	Cornaceae	Griselinia racemosa (Phil.) Taub.	X-XI	Shrubby	Purple	Non-endemic
	Cornaceae	Griselinia ruscifolia (Clos) Taub.	X-XII	Shrubby	Purple	Non-endemic
	Cornaceae	Griselinia scandens (R. et P.) Taub.	IV-XI	Shrubby	Red purplish	Endemic
	Escrofulariaceae	Jovellana punctata R. et P.	VIII-X	Shrubby	pale violet- lower yellow spot	Endemic
	Escrofulariaceae	Jovellana violacea (Cav.) G. Don	VIII-X	Shrubby	Purple-pink- lower yellow spot	Endemic
	Solanaceae	Latua pubiflora (Griseb.) Phil	X	Shrubby	red-pink	Endemic
	Asteraceae	Leptocarpha rivularis DC.	VII-X	Shrubby	Yellows	Endemic
	Lobeliaceae	Lobelia bridgesii H. et A.	V-X	Shrubby	red	Endemic
	Lobeliaceae	Lobelia tupa L.	X	Shrubby	pink	Endemic
	Celastraceae	Maytenus chubutensis (Speg.) Lourt.- O´Don. et Sleum.	VIII-XII	Shrubby	red	Non-endemic
	Celastraceae	Maytenus disticha (Hook).f.) Urban	VII-XII	Shrubby	White or red-wine	Non-endemic
	Santalaceae	Myoschilos oblongum R. et P.	IV-XI	Shrubby	red	Non-endemic
	Mirtaceae	Myrceugenia chrysocarpa (Berg) Kausel	VIII-X	Shrubby	White	Endemic
	Mirtaceae	Myrceugenia leptospermoides (DC.) Kausel	VIII-IX	Shrubby	White	Endemic
	Mirtaceae	Myrteola nummularia (Poir.) O. Berg	X-XII	Shrubby	White	Non-endemic
	Proteaceae	Orites myrtoidea (P. et E.) B. et H. ex Sleumer	VII, VIII	Shrubby	Yellow	Non-endemic
	Timelaceae	Ovidia andina (P. et E.) Meisn.	VII-XI	Shrubby	White-yellowish	Non-endemic
	Timelaceae	Ovidia pillo-pillo (Gay) Meisn.	IX-X	Shrubby	White-yellowish	Endemic
	Asteraceae	Podanthus ovatifolius Lag.	VI-X	Shrubby	Yellow	Endemic
	Ramnaceae	Rhamnus diffusus Clos	VIII-X	Shrubby	red dark	Endemic
	Saxifragaceae	Ribes cucullatum Hook. & Arn.	R.M.-X	Shrubby	Green-yellowish	Non-endemic
	Saxifragaceae	Ribes magellanicum Poir	X-XII	Shrubby	Yellow reddish	Non-endemic
	Labiadas	Satureja multiflora (R. et P.) Briq	IX-X	Shrubby	Pink intense	Endemic
	Anacardiaceae	Schinus Patagonicus (Phil.) Johnst.	VIII-X	Shrubby	Yellowivory	Endemic
	Asteraceae	Senecio cymosus Remy	VIII-XI	Shrubby	Yellow	Endemic
	Asteraceae	Senecio poeppigii H. et A.	VII-X	Subshrub	Yellow-Orange	Non-endemic
	Asteraceae	Senecio portalesianus Remy	VIII-XII	Subshrub	Yellow	Non-endemic
	Asteraceae	Senecio triodon Phil.	VII-XI	Subshrub	Yellow	Non-endemic
	Solanaceae	Solanum cyrtopodium Dunal	VIII-X	Shrubby	Purple	Non-endemic
	Solanaceae	Solanum gayanum (Remy) reiche	VIII-XI	Shrubby	violet	Non-endemic
	Solanaceae	Solanum valdiviense Dunal	VII-X	Shrubby	Blue-Purple	Non-endemic
	Mirtaceae	Ugni candollei (Barn.) Berg.	X	Shrubby		Endemic
	Mirtaceae	Ugni molinae Turcz	VII-XI	Shrubby		Non-endemic
	Solanaceae	Vestia foetida (R. et P.) Hoffmanns.	V-X	Shrubby	Yellow	Endemic
	Violaceae	Viola portalesia Gay	IV-X, XVI	Shrubby	Bluees-Sky blues	Endemic
	Violaceae	Viola rubella Cav.	VIII-X	Shrubby	Pink lilaceo	Endemic
	Cactaceae	Maihuenia poeppigii (Otto ex Pfeiff.) K. Schum.	VII-VIII	Subshrub	Yellow- red	Non-endemic
Climbing/creeping	Gesneriaceae	Asteranthera ovata (Cav.) Hanst. Emend Peréz- Moreau	IX-XII	Shrubby-creeping	red	Non-endemic
	Flacourtaceae	Berberidopsis corallina Hook. f.	VII-VIII	Creeper	red	Endemic
	Lardizabalaceae	Boquila trifoliolata (DC.) Dcne.	VI-X	Creeper	yellow-creamy	Non-endemic
	Bignoniaceae	Campsidium valdivianum (Phil.) Skottsb.	VII-XII	Creeper	red	Non-endemic
	Vitaceae	Cissus striata R. et P.	IV-XI	Creeper	Green yellowish	Non-endemic
	Dioscoreaceae	Dioscorea brachybotrya Poepp.	R.M.-X	Creeper	yellow-creamy	Non-endemic
	Apocinaceae	Elytropus chilensis (A.DC.) Muell Arg.	VII-X	Creeper	whites	Non-endemic
	Fitolacaceae	Ercilla syncarpellata	VII-X	Shrubby	White-pink pale	Non-endemic
	Liliaceae	Herreria stellata R. et P.	VII-XII	Creeper	Yellow-greenish	Endemic
	Hidrangeaceae	Hydrangea serratifolia (H. et A.) Phil.	V-XI	Creeper	White- pale pink	Non-endemic
	Filesiaceae	Lapageria rosea R. et P.	V-XI	Creeper	red	Endemic
	Lardizabalaceae	Lardizabala biternata R. et P.	V-X	Creeper	purplish dark	Endemic
	Filesiaceae	Luzuriaga radicans R. et P.	VI-XI	Shrubby-creeping	white with Purple	Non-endemic
	Filesiaceae	Luzuriaga polyphylla (Hook.) Mebr.	VII-XI	Shrubby-creeping	white with Purple	Endemic
	Gesneriaceae	Mitraria coccinea Cav.	VII-XII	Shrubby-creeping	Red-to orange	Non-endemic
	Asteraceae	Mutisia decurrens Cav.	VII-XII	Creeper	orange	Non-endemic
	Asteraceae	Mutisia spinosa R. et P.	VII-XI, XIV, XVI	Creeper	pink	Non-endemic
	Asteraceae	Mutisia subulata R. et P.	V-IX	Creeper	red	Endemic
	Filesiaceae	Philesia magellanica J.F.Gmel.	X-XII	Shrubby-creeping	Pink-reddish	Non-endemic
	Araliaceae	Pseudopanax valdiviensis (Gay) Seemann ex Reiche	VIII-X	Creeper	White ivory	Endemic
	Gesneriaceae	Sarmienta repens R. et P.	VII-X	Creeper	red	Endemic
	Solanaceae	Solanum krauseanum Phil.	X-XII	Shrubby-creeping	White	Non-endemic
	Tropeolaceae	Tropaeolum gracile (Hook. Et Arn.) Sparre	VII-VIII	Creeper	Yellow, intense yellow	Endemic
	Tropeolaceae	Tropaeolum speciosum P. et E.	VIII-X	Creeper	Red	Endemic
Ferns	Adiantaceae	Adiantum chilense Kauf	IV-XII	Creeping rhizome Fern		Non-endemic
	Aspleniaceae	Asplenium dareoides Desv.	IV-XII (J.F)	Fern		Non-endemic
	Blechnaceae	Blechnum chilense (Kaulf.) Mett	IV-XII (J.F)	Fern		Non-endemic
	Blechnaceae	Blechnum arcuatum Remy	VII-XI	Fern		Non-endemic
	Blechnaceae	Blechnum magellanicum (Desu.) Mett.	VII-XII	Fern		Endemic
	Blechnaceae	Blechnum penna-marina (Poiret) Kuhn	IX-XII	Fern		Non-endemic
	Equisetaceae	Equisetum bogotense Kunth	I-XI	Rhizomatous Fern		Non-endemic
	Gleicheniaceae	Gleichenia quadripartita (Poiret) T. Moore	VIII-XII (J.F)	Creeping rhizome Fern		Non-endemic
	Gleicheniaceae	Gleichenia squamulosa (Desv.) T. Moore	VII-XI (J.F)	Creeping rhizome Fern		Endemic
	Hymenophylaceae	Hymenoglossum cruentum K. Presl	IX-XII	Fern		Non-endemic
	Hymenophylaceae	Hymenophyllum caudiculatum v. productum (K. Presl) C. Chr.	VIII-XII (J.F)	Fern		Non-endemic
	Hymenophylaceae	Hymenophyllum dentatum Cav.	VIII-XI	Fern		Non-endemic
	Hymenophylaceae	Hymenophyllum dicranotrichum (K. Presl) Hook. Ex Sadeb.	VIII-XI	Fern		Endemic
	Hymenophylaceae	Hymenophyllum ferrugineum Colla	X-XII (J.F)	Fern		Non-endemic
	Hymenophylaceae	Hymenophyllum krauseanum Phil.	VIII-XI	Fern		Non-endemic
	Hymenophylaceae	Hymenophyllum fuciforme Sw.	VII-XI (J.F)	Fern		Non-endemic
	Hymenophylaceae	Hymenophyllum pectinatum Cav.	IX-XII (J.F)	Fern		Non-endemic
	Dennstaedtiaceae	Hypolepis poeppigii (Kunze) R.A.Rodr	IV-XII (J.F)	Creeping rhizome Fern		Non-endemic
	Dicksoniaceae	Lophosoria quadripinnata (J.F.Gmelin) C. Chr.	VII-XI (J.F)	Rhizomatous Fern		Non-endemic
	Licopodiaceae	Lycopodium magellanicum (P. Beauv.) Sw.	IX-XII	Fern		Non-endemic
	Licopodiaceae	Lycopodium paniculatum Desv.	VIII-XII (J.F)	Fern		Non-endemic
	Dryopteraceae	Megalastrum spectabile (Kaulf.) A.R.Sm. Et R.C.Moran	IV-XI	Fern		Non-endemic
	Dryopteraceae	Polystichum plicatum (Poepp. Ex Kunze) Hicken	IV-XII	Fern		Non-endemic
	Dryopteraceae	Polystichum subintegerrimum (Hook. Et Arn.) R.A Rodr.	VII-XI	Fern		Endemic
	Dryopteraceae	Polystichum chilense (Christ) Diels	VII-XII	Fern		Non-endemic
	Pteridaceae	Pteris semiadnata Phil.	VIII-XII	Fern		Non-endemic
	Pteridaceae	Pteris chilensis Desv.	IV-X	Fern		Endemic
	Polipodiaceae	Rumohra adiantiformis (G.Forster) Ching	IV-XI	Fern		Non-endemic
Herbaceous	Rosaceae	Acaena ovalifolia R. et P.	VII-XII, (J.F)	Herb	red	Non-endemic
	Rosaceae	Acaena magellanica (Lam.) Vahl.	II-XII	Herb	Green Reddish	Non-endemic
	Asteraceae	Adenocaulon chilense Less.	VIII-XII	Herbaceous rhizomatous	White	Non-endemic
	Papilionaceae	Adesmia longipes Phil.	R.M.-X	Herb	Yellow, red	Non-endemic
	Gramíneas	Agrostis inconspicua Kunze ex Desv.	V-XII	Herb	reddish or Purplish	Non-endemic
	Gramíneas	melica violacea Cav.	V-X	Herb	reddish	Endemic
	Alstroemeriaceae	Alstroemeria aurea R. Graham	VIII-XI	Herbaceous rhizomatous	Yellow to orange	Non-endemic
	Alstroemeriaceae	Alstroemeria presliana ssp. Presliana Herbert.	VIII	Herbaceous rhizomatous	pink	Endemic
	Alstroemeriaceae	Alstroemeria presliana ssp. Australis Bayer	VIII-IX	Herbaceous rhizomatous	pink-reddish	Non-endemic
	Ranunculaceae	Anemone hepaticifolia Hook.	X	Herbaceous rhizomatous	White or reddish	Endemic
	Ranunculaceae	Anémona Anemone multifida Poir.	VIII-XII	Herbaceous rhizomatous	White- cream-pink-yellow- or greenish	Non-endemic
	Asteraceae	Aster vahlii (Gaud.) Hook. et Arn.	VII-XII	Herbaceous rhizomatous	White or lila	Non-endemic
	Escrofulariaceae	Calceolaria biflora Lam.	IV-XII	Herb	Yellow	Non-endemic
	Escrofulariaceae	Calceolaria crenatiflora Cav.	X	Herb	Yellow - Red	Non-endemic
	Escrofulariaceae	Calceolaria tenella Poepp.	VIII-XII	Herb	Yellow - Red	Non-endemic
	Escrofulariaceae	Calceolaria volckmannii Phil.	VII-IX	Herb	Yellow	Non-endemic
	Ranunculaceae	Caltha appendiculata Pers.	VII-XII	Herb	Ivory-greenish	Non-endemic
	Ranunculaceae	Caltha sagittata Cav.	I-XII	Herb	Ivory-greenish	Non-endemic
	Saxifragaceae	Chrysosplenium valdivicum Hook.	X	Herbaceous Creeping	Green	Non-endemic
	Asteraceae	Cotula scariosa (Cass.) Franchet	VII-XII	Herb	Yellow	Non-endemic
	Crucíferas	Draba gilliesii Hook. et Arn.	VIII-X	Herb	White	Non-endemic
	Asteraceae	Erigeron andicola DC.	R.M.-XII	Herb	White-pink or reddish	Non-endemic
	Asteraceae	Erigeron cinereus Hook. et Arn.	R.M.-X	Herb	White or pink	Non-endemic
	Asteraceae	Erigeron leptopetalus Phil.	XII	Herbaceous rhizomatous	White or lila	Non-endemic
	Escrofulariaceae	Euphrasia chrysantha Phil.	VII-IX	Herb	Yellow	Non-endemic
	Escrofulariaceae	Euphrasia flavicans Phil.	X	Herb	White with Yellow	Non-endemic
	Escrofulariaceae	Euphrasia subexserta Benth.	R.M.-X	Herb	White with Yellow	Non-endemic
	Escrofulariaceae	Euphrasia trifida Poepp. Ex Benth.	VII-X	Herb	White with Yellow	Non-endemic
	Saxifragaceae	Francoa appendiculata Cav.	V-X	Herb	White to pink	Endemic
	Gentianaceae	Gentianella magellanica (Gaud.) Fabris ex D.M.Moore	VII-XI, XIV, XVI	Herb	white- Blue- violet or Purple	Non-endemic
	Rosaceae	Geum magellanicum Pers.	V-XII	Herb	red to Yellow	Non-endemic
	Gunneraceae	Gunnera magellanica Lam.	VII-XII	Herbaceous rhizomatous		Non-endemic
	Gunneraceae	Gunnera tinctoria (Mol.) Mirb.	IV-XII	Herbaceous rhizomatous	reddish	Non-endemic
	Asteraceae	Haplopappus diplopappus Remy	VI-IX	Herbaceous-Subshrub	Yellow	Non-endemic
	Asteraceae	Haplopappus grindelioides (Less.) DC.	VI-IX, R.M.	Herbaceous-Subshrub	Yellow	Non-endemic
	Asteraceae	Haplopappus macrocephalus (Less.) DC.	V-IX, XVI, R.M.	Herbaceous-Subshrub	Yellow	Endemic
	Iridaceae	Herbertia lahue (Mol.) Goldbl.	V-X	Herb	Sky blue, white	Non-endemic
	Umbelíferas	Hydrocotyle chamaemorus Cham. Et Schlecht.	VII-X	Herb	Green	Non-endemic
	Umbelíferas	Hydrocotyle poeppigii DC.	VII-X	Herb	Green	Endemic
	Asteraceae	Hypochaeris arenaria Gaud.	IX-XII	Herb	Yellow	Non-endemic
	Juncaceae	Juncus procerus E. Meyer	VII-X	Herb		Non-endemic
	Asteraceae	Leucheria coerulescens Remy	IX-X	Herb	BlueSky blue	Non-endemic
	Asteraceae	Leucheria lithospermifolia (Less.) Reiche	VII-VIII	Herb	pink	Non-endemic
	Asteraceae	Leucheria nutans (Remy) Reiche	VIII-IX	Herb	Red to white	Non-endemic
	Asteraceae	Leucheria thermarum (Phil.) Phil.	VIII-IX	Herb	Blue	Non-endemic
	Iridaceae	Libertia chilensis (Mol.) Gunckel	VII-XII (J.F)	Herb	White	Non-endemic
	Iridaceae	Libertia tricocca Phil.	VIII-X	Herb	White	Endemic
	Primulaceae	Lysimachia sertulata Baudo	VIII-XI	Herb	White	Non-endemic
	Rubiaceae	Nertera granadensis (Mutis ex L.f.) Druce	VII-XII	Herb	White-greenish	Non-endemic
	Rubiaceae	Galium hypocarpium (L.) Endl. Ex Griseb.	IV-X	Herb	Yellow-greenish	Non-endemic
	Solanaceae	Nierembergia repens R. et P.	VII-X	Herb	White centre Yellow	Non-endemic
	Onagraceae	Oenothera stricta Ledeb. ex Link	III-XII, XIV, XVI, I.P.	Herb	Yellow	Non-endemic
	Escrofulariaceae	Ourisia alpina P. et E.	VII-X	Herb	pink	Non-endemic
	Escrofulariaceae	Ourisia ruelloides (L.f.) O.K.	R.M.-XII	Herb	red	Non-endemic
	Escrofulariaceae	Ourisia microphylla P. et E.	VII-VIII	Subshrub	pink	Non-endemic
	Escrofulariaceae	Ourisia polyantha P. et E.	R.M.-X	Subshrub	Red-Orange	Non-endemic
	Oxalidaceae	Oxalis valdiviensis Barn.	VIII-X	Herb	Yellow	Non-endemic
	Asteraceae	Perezia capito (Phil.) Reiche	IX	Herb	Blue	Non-endemic
	Asteraceae	Perezia fonkii (Phil.) Reiche	X	Herb	White	Non-endemic
	Asteraceae	Perezia nutans Less.	R.M.-IX	Herb	Purple-whitish	Non-endemic
	Asteraceae	Perezia pedicularidifolia Less.	VII-XI	Herb	Blue-Sky blue	Non-endemic
	Asteraceae	Perezia recurvata (Vahl) Less.	R.M.-XII	Herb	white or white blue	Non-endemic
	Hidrofilaceae	Phacelia secunda J.M.Gmel.	I-XII, XIV-XVI, R.M.	Herb	White or Blue-violet	Non-endemic
	Urticaceae	Pilea elegans Gay	IX-X	Herb		Endemic
	Urticaceae	Pilea elliptica Hook. F.	VIII-X	Herb		Endemic
	Lentibulariaceae	Pinguicula chilensis Clos	IX-X	Herb	violet	Non-endemic
	Poligalaceae	Polygala gnidioides Willd.	IV-XI, XIV, XVI, R.M.	Herb	Blue lila	Endemic
	Poligalaceae	Polygala salasiana Gay	R.M.-VIII	Herb	Blue-Sky blue	Non-endemic
	Rosaceae	Potentilla chiloensis (L.) Mabb.	VII-XI	Herb	white	Non-endemic
	Ranunculaceae	Ranunculus peduncularis J.E.Sm.	IV-XII	Herb	Yellow	Non-endemic
	Amarilidaceae	Rhodophiala andicola (Poepp.) Traub.	IX-XI	Herb	Pink Purple- whitish stripe	Non-endemic
	Amarilidaceae	Rhodophiala araucana (Phil.) Traub.	IX	Herb	Yellow with Pink	Endemic
	Amarilidaceae	Rhodophiala bakeri (Phil.) Traub	VII-IX	Herb	Yellow	Endemic
	Amarilidaceae	Rhodophiala chilensis (L`Herit.) Traub	VIII-IX	Herb	red base Yellow	Endemic
	Amarilidaceae	Rhodophiala moelleri (Phil.) Traub	IX	Herb	red pink- White or White yellowish	Endemic
	Rosaceae	Rubus geoides J.E.Sm.	VII-XII	Herb	pink pale-White	Non-endemic
	Asteraceae	Senecio otites Kunze ex DC.	VIII-XI	Herb	Yellow	Non-endemic
	Asteraceae	Senecio smithii DC.	X-XII	Herb	White with Yellow	Non-endemic
	Asteraceae	Senecio trifurcatus (Forst.) Less.	IX-XII	Herb	White with Yellow	Non-endemic
	Cariofilaceae	Silene andicola Gillies ex Hook. Et Arn.	X	Herb	pink-Purple	Non-endemic
	Cariofilaceae	Silene plutonica Naudin.	IX-X	Herb	White	Non-endemic
	Iridaceae	Sisyrinchium pearcei Phil.	IX-X	Herb	Yellow	Endemic
	Iridaceae	Sisyrinchium arenarium Poepp.	IV-IX	Herb	Yellow	Non-endemic
	Ciperaceae	Uncinia brevicaulis auct. non (Thouars) Kunth	IX-XII	Herb		Non-endemic
	Ciperaceae	Uncinia erinacea (Cav.) Pers.	VIII-X	Herb		Endemic
	Ciperaceae	Uncinia multifaria Nees ex Boott	IX-X	Herb		Non-endemic
	Valerianaceae	Valeriana fonckii Phil.	VII-XI	Herb	white pink	Non-endemic
	Valerianaceae	Valeriana lapathifolia Vahl	X-XII	Herb	White	Non-endemic
	Valerianaceae	Valeriana philippiana Briq.	X	Herb	pink	Non-endemic
	Purple	Viola reichei Skottsb.	VII-XII, XIV, XVI	Herb		Non-endemic
	Orquidaceae	Codonorchis lessonii (Brongn.) Lindl.	VII-XII, XIV, XVI	Herb	White - green-yellowish	Non-endemic
	Orquidaceae	Chloraea gaudichaudii Brongn.	XIV, VIII-XII	Herb	White - greenish	Non-endemic
	Orquidaceae	Chloraea grandiflora Poepp.	VII-IX,XIV	Herb	Dark green	Endemic
	Orquidaceae	Chloraea lamellata Lindl.	VI, VIII-IX, XIV, XVI	Herb	Yellow	Endemic
	Orquidaceae	Chloraea lechleri Lindl. Ex Kraenzl.	VIII-IX	Herb	White - black	Non-endemic
	Orquidaceae	Chloraea longipetala Lindl.	VII-X, XVI	Herb	White	Endemic
	Orquidaceae	Chloraea magellanica Hook. f.	VII-XII, XIV, XVI	Herb	White - greenish	Non-endemic
	Orquidaceae	Chloraea nudilabia Poepp.	VII-IX, XVI	Herb	Yellow - orange	Endemic
	Orquidaceae	Chloraea philippi Rchb. f.	VIII-XI	Herb	White	Non-endemic
	Orquidaceae	Chloraea virescens (Willd.) Lindl.	VIII-X, XIV	Herb	White	Non-endemic
	Orquidaceae	Chloraea viridiflora Poepp.	VII-VIII, XVI	Herb	Green	Non-endemic
	Orquidaceae	Gavilea araucana (Phil.) M.N. Correa	V-XII, XIX, XVI	Herb	Ivory - green	Non-endemic
	Orquidaceae	Gavilea lutea (Pers.) M.N. Correa	VIII-XII, XVI	Herb	Yellow	Non-endemic
	Orquidaceae	Gavilea odoratissima Poepp.	VII-XI, XIV, XVI	Herb	Pale yellow	Non-endemic
	Bromeliaceae	Fascicularia bicolor (R. et P.) Mez	V-XI, XIV	Epiphytic or terrestrial herb	Blue	Endemic
	Bromeliaceae	Fascicularia litoralis (Phil.)Mez	VI-VIII	Herb	Blue	Endemic
	Bromeliaceae	Greigia sphacelata (R. et P.) Regel	VII-X, XVI	Herb	Semi Pink - white	Endemic
	Bromeliaceae	Ochagavia carnea (Beer) L.B. Sm. & Looser	V-IX, XVI	Herb	Yellow	Endemic
	Bromeliaceae	Puya alpestris (Poepp.) Gay	IV-IX	Herb	Dark blue	Endemic

## Sheet: Andes Mountains
Table S2. List of endemic and non-endemic Chilean species selected according to their ornamental value.
Growth habit	Family	Scientific name	Distribution	Growth habit (details)	Flower Color	Endemic/Non-endemic
Tree	Escalloniaceae	Escallonia myrtoidea Bertero ex DC.	IV-XVI	Arboreal	White	Non-endemic
	Rosaceae	Kageneckia angustifolia D.Don	IV-VII	Arboreal	White	Endemic
	Rosaceae	Polylepis rugulosa Bitter	XV	Arboreal	Green	Non-endemic
	Rosaceae	Polylepis tarapacana Phil.	XV-I, II	Arboreal		Non-endemic
	Cactaceae	Leucostele atacamensis (Phil.) Schlumpb.	I, II	Tree	White-pink	Non-endemic
	Cactaceae	Browningia candelaris (Meyen) Britton et Rose	XV, I	Tree	pale pink or white	Non-endemic
Shrub	Fabaceae	Adesmia emarginata Clos	VII-X	SubShrub	Yellow	Non-endemic
	Fabaceae	Adesmia aphylla Clos	III-IV	Shrub		Endemic
	Fabaceae	Adesmia atacamensis Phil	XV, IV	Shrub	Yellow	Endemic
	Fabaceae	Adesmia obscura Clos	III, IV	Shrub	Yellow	Endemic
	Fabaceae	Adesmia subterranea Clos	III-IV	Shrub	Yellow-Orange	Non-endemic
	Fabaceae	Adesmia frigida Phil.	II, III	Shrub		Non-endemic
	Fabaceae	Adesmia minor (Hook. Et Arn.) Burkart	IV-V	Shrub		Non-endemic
	Fabaceae	Adesmia occulta (R.E.Fries) Burkart	XV-II	Shrub		Non-endemic
	Fabaceae	Adesmia spinosissima Meyen ex Vogel	XV-II	Shrub	Yellow	Non-endemic
	Fabaceae	Adesmia horrida Gillies ex Hook. Et Arn	II	Shrub		Non-endemic
	Fabaceae	Adesmia melanthes Phil.	XV-II	Shrub		Non-endemic
	Fabaceae	Adesmia aegiceras Phil	III-IV	SubShrub	Yellow	Non-endemic
	Fabaceae	Adesmia echinus C.Presl	III-IV	SubShrub	Yellow	Non-endemic
	Fabaceae	Adesmia hystrix Phil	II-IV	Shrub	Yellow	Endemic
	Fabaceae	Adesmia gracilis Meyen ex Vogel	IV-VII	Shrub	Yellow	Non-endemic
	Fabaceae	Adesmia schneideri Phil	R.M., VI	Shrub	Yellow	Non-endemic
	Fabaceae	Adesmia volckmannii Phil	VII-XII	Shrub		Non-endemic
	Asteraceae	Aldama helianthoides (Rich.) E.E.Schill. & Panero	XV	SubShrub	Yellow	Non-endemic
	Asteraceae	Aldama revoluta (Meyen) E.E.Schill. & Panero	I-VIII	SubShrub	Yellow	Non-endemic
	Verbenaceae	Aloysia deserticola (Phil.) Lu- Irving & O´Leary	XV-I, II	Shrub	pink	Non-endemic
	Verbenaceae	Aloysia tarapacana (Botta) Lu-Irving & O´Leary	XV	Shrub	pink	Endemic
	Verbenaceae	Aloysia trifida (Gay) Lu-Irving & O´Leary	IV	Shrub	White	Non-endemic
	Asteraceae	Ambrosia artemisioides Meyen et Walp.	XV-II	Shrub	Yellow	Non-endemic
	Fabaceae	Anarthrophyllum andicola (Gillies ex Hook. Et Arn.) F.Phil.	IV-VI	Shrub	Yellow	Endemic
	Fabaceae	Anarthrophyllum cumingii (Hook. Et Arn.) F.Phil.	IV-VII	Shrub	Yellow	Endemic
	Fabaceae	Anarthrophyllum desideratum (DC.) Benth.	XI-XII	Shrub	Intense red	Non-endemic
	Fabaceae	Anarthrophyllum gayanum (A. Gray) Jacks.	IV-R.M.	Shrub	Yellow	Non-endemic
	Asteraceae	Aphyllocladus denticulatus (J.Remy ex Gay) Cabrera	XV-III	Shrub	Purple	Endemic
	Asteraceae	Artemisia copa Phil.	I-III	Shrub	Yellow	Non-endemic
	Quenopodiaceae	Atriplex imbricata (Moq.) D.Dietr.	XV-III	Shrub	Yellow ivory	Non-endemic
	Salicaceae	Azara alpina Poepp. Et Endl.	VII-X	Shrub	Yellow	Non-endemic
	Apiaceae	Azorella atacamensis G.M Plunkett & A.N. Nicolas	II-III	SubShrub	Yellow	Non-endemic
	Apiaceae	Azorella compacta Phil.	XV-I, II	Shrub		Non-endemic
	Apiaceae	Azorella cryptantha (Clos) Reiche	III, IV	SubShrub	White	Non-endemic
	Apiaceae	Azorella lycopodioides Gaudich.	XI, XII	SubShrub	White yellowish	Non-endemic
	Apiaceae	Azorella Madreporica Clos	III-VII	Shrub	Yellow	Non-endemic
	Apiaceae	Azorella monantha Clos	IV-XII	SubShrub	Yellow	Non-endemic
	Apiaceae	Azorella spinosa (Ruiz et Pav.) Pers.	IV-IX, X, XVI, R.M.	Shrub		Endemic
	Apiaceae	Azorella prolifera (Cav.) G.M. Plunkett & A.N. Nicolas	III-XII	SubShrub	Yellow	Non-endemic
	Apiaceae	Azorella ruizii G.M.Plunkett & A.N.Nicolas	III-VII	SubShrub	Intense yellow	Non-endemic
	Apiaceae	Azorella trifurcata (Gaertn.) Pers.	VIII-XII	SubShrub		Non-endemic
	Apiaceae	Azorella ameghinoi Speg	XII	Shrub		Non-endemic
	Apiaceae	Azorella fuegiana Speg	XI-XII	Shrub		Non-endemic
	Asteraceae	Baccharis alnifolia Meyen et Walp.	XI	Shrub		Non-endemic
	Asteraceae	Baccharis boliviensis (Wedd.) Cabrera	XV-II	Shrub		Non-endemic
	Asteraceae	Baccharis magellanica (Lam.) Pers.	VII-XII	Shrub		Non-endemic
	Asteraceae	Baccharis neaei DC.	IV-IX	Shrub		Non-endemic
	Asteraceae	Baccharis nivalis (Wedd.) Sch. Bip. ex Phil.	IX-XII	Shrub		Non-endemic
	Asteraceae	Baccharis poeppigiana DC.	IV, V, R.M	Shrub		Non-endemic
	Asteraceae	Baccharis santelicis Phil.	XV-II	Shrub		Non-endemic
	Asteraceae	Baccharis tola Phil.	XV-III	Shrub		Non-endemic
	Ledocarpaceae	Balbisia microphylla (Phil.) Reiche	XV, I	Shrub	Yellow	Non-endemic
	Berberidaceae	Berberis empetrifolia Lam.	IV-XII	Shrub	Yellow	Non-endemic
	Berberidaceae	Berberis montana Gay	V-X	Shrub	Yellow pale	Non-endemic
	Apiaceae	Bolax gummifera (Lam.) Spreng	XII	Shrub	Greenish yellow	Non-endemic
	Calceolariaceae	Calceolaria andina Benth	V-VII	SubShrub	Yellow Orange	Endemic
	Calceolariaceae	Calceolaria hypericina Poepp. ex Benth	IV-VI	SubShrub	Yellow	Endemic
	Calceolariaceae	Calceolaria inamoena Kraenzl.	XV, I	SubShrub	Yellow gold	Endemic
	Calceolariaceae	Calceolaria pallida Phil.	VII-VIII	SubShrub	Gold Yellow	Endemic
	Calceolariaceae	Calceolaria pinifolia Cav.	III-VII	SubShrub	Yellow with Red	Endemic
	Calceolariaceae	Calceolaria segethii Phil.	IV-R.M.	SubShrub	Gold Yellow	Endemic
	Calceolariaceae	Calceolaria stellariifolia Phil.	XV-I, II	SubShrub	Yellow with Red	Endemic
	Asteraceae	Chiliotrichum diffusum (G.Forst.) Kuntze	XI-XII	Shrub	White	Non-endemic
	Asteraceae	Chuquiraga atacamensis Kuntze	XV-II	Shrub	Yellow-Orange	Non-endemic
	Asteraceae	Chuquiraga kuschelii Acevedo	XV, I	Shrub		Endemic
	Asteraceae	Chuquiraga oppositifolia D.Don	IV-VII	Shrub	Yellow	Non-endemic
	Asteraceae	Chuquiraga spinosa Less.	I-III, XV	Shrub		Non-endemic
	Euforbiaceae	Colliguaja integerrima Gillies et Hook.	IV-XII	Shrub	Yellow reddishs	Non-endemic
	Apocinaceae	Diplolepis mucronata (Decne.) Hechem & C. Ezcurra	V, R.M.	SubShrub	Yellow	Endemic
	Apocinaceae	Diplolepis nummulariifolia (Hook. et Arn.) Liede et Rapini	IV-IX	SubShrub	White	Non-endemic
	Asteraceae	Diplostephium meyenii Wedd.	XV-II	Shrub	White with Yellow	Non-endemic
	Rhamnaceae	Discaria articulata (Phil.) Miers	VII-VIII	Shrub	White	Non-endemic
	Rhamnaceae	Discaria nana (Clos) Benth. et Hook. f. ex Weberb.	IV-IX	Shrub	White	Endemic
	Rhamnaceae	Discaria trinervis (Gillies ex Hook. et Arn.) Reiche	III-VII	Shrub	White	Endemic
	Solanaceae	Dunalia spinosa (Meyen) Dammer	XV-I	Shrub	Purple	Non-endemic
	Escalloniaceae	Escallonia alpina Poepp. ex DC.	R.M.-XII	Shrub	reds-pinks-Whites	Non-endemic
	Escalloniaceae	Escallonia virgata (Ruiz et Pav.) Pers.	VII-XII	Shrub	pink- White por dentro	Non-endemic
	Solanaceae	Fabiana Bryoides Phil.	II-III	Shrub	Lila pale or White	Non-endemic
	Solanaceae	Fabiana denudata Miers	I-II	Shrub	Yellow	Non-endemic
	Solanaceae	Fabiana imbricata Ruiz. et Pav.	III-XII	Shrub	White-Sky blue or lilacea	Non-endemic
	Solanaceae	Fabiana ramulosa (Wedd.) Hunz. et Barboza	XV-II	Shrub	Yellow	Non-endemic
	Solanaceae	Fabiana squamata Phil.	I, II	Shrub	greenish yellow	Endemic
	Solanaceae	Fabiana stephanii Hunz. et Barboza	XV	Shrub	Yellow	Non-endemic
	Rubiaceae	Galium eriocarpum Bartl. Ex DC.	IV-VI	SubShrub	cream Yellow clara	Non-endemic
	Rubiaceae	Galium gilliesii Hook. et Arn	IV-VI	SubShrub	cream	Non-endemic
	Rubiaceae	Galium suffruticosum Hook. et Arn.	III-VII	SubShrub	cream	Non-endemic
	Ericaceae	Gaultheria caespitosa Poepp. Et Endl.	V-XI	SubShrub	pink	Non-endemic
	Ericaceae	Gaultheria poeppigii DC.	VII-XI	Shrub	White	Non-endemic
	Ericaceae	Gaultheria pumila (L.f.) D.J. Middleton	V-XII	Shrub	White or pink	Non-endemic
	Verbenaceae	Glandularia gynobasis (Wedd.) Schnack et Covas	XV, I	SubShrub	Pink	Non-endemic
	Verbenaceae	Glandularia ribifolia (Walp.) P.Peralta	R.M.-VI	Shrub	Purple	Endemic
	Sapindaceae	Guindilia trinervis Gillies ex Hook. et Arn.	IV-VII	Shrub	White reddish	Non-endemic
	Apiaceae	Gymnophyton isatidicarpum ( C. Presl) ex DC.) Mathias et constance	IV-VI	Shrub	Yellow	Endemic
	Asteraceae	Haplopappus anthylloides Meyen et Walp.	R.M.-VI	Shrub	Yellow Orange	Non-endemic
	Asteraceae	Haplopappus baylahuen J.Remy	III, IV	Shrub	Yellow	Non-endemic
	Asteraceae	Haplopappus diplopappus J.Remy	R.M.-VII	SubShrub	Yellow	Endemic
	Asteraceae	Haplopappus rigidus Phil.	I-III	Shrub	Yellow	Non-endemic
	Asteraceae	Haplopappus scrobiculatus (Nees) DC.	V, R.M.	Shrub	Yellow-Orange	Non-endemic
	Asteraceae	Haplopappus velutinus J.Remy	IV-VI	Shrub	Yellow	Non-endemic
	Asteraceae	Haplopappus glutinosus Cass. Ex DC.	VIII-XI	Shrub		Non-endemic
	Asteraceae	Haplopappus grindelioides DC.	VII-VIII	Shrub		Non-endemic
	Asteraceae	Haplopappus schumannii (Kuntze) G.K.Br. Et W.D.Clark	V, R.M.	Shrub		Endemic
	Verbenaceae	Junellia origenes (Phil.) N.O`Leary & P. Peralta	II-IV	SubShrub	White with Red en base	Non-endemic
	Verbenaceae	Junellia seriphioides (Gillies et Hook.) Moldenke	XV-I, II	Shrub	pink	Non-endemic
	Verbenaceae	Junellia spathulata (Gillies et Hook.) Moldenke	V, R.M.	Shrub	White to lila	Non-endemic
	Verbenaceae	Junellia uniflora (Phil.) Moldenke	III-IV	Shrub	White-pink or lila	Non-endemic
	Krameriaceae	Krameria lappacea (Dombey) H.M. Burdet et B.B.Simpson	XV-II	Shrub	pink dark	Non-endemic
	Verbenaceae	Lampaya medicinalis Phil.	XV-II	Shrub	Purple	Non-endemic
	Verbenaceae	Mulguraea arequipensis (Botta) N. O`Leary & P.Peralta	XV	Shrub	Yellow	Non-endemic
	Verbenaceae	Mulguraea scoparia (Gillies & Hook. ex Hook.) N. O`Leary & Peralta	IV-VI	Shrub	White or lila	Non-endemic
	Verbenaceae	Mulguraea cinerascens (schauer) N. O'leary & P.Peralta	IV-V	Shrub		Endemic
	Asteraceae	Mutisia acerosa Poepp. Ex Less.	IV-VII	Shrub	White- enves Pink	Non-endemic
	Asteraceae	Mutisia acuminata Ruiz et Pav.	XV	Shrub	Orange intense	Non-endemic
	Asteraceae	Mutisia hamata Reiche	XV-II	Shrub	red or Orange	Non-endemic
	Asteraceae	Mutisia linerifolia Cav.	VII, VIII	Shrub	Yellow	Non-endemic
	Asteraceae	Mutisia olidogon Poepp. Et Less.	VIII-X	Shrub	pink	Non-endemic
	Asteraceae	Mutisia rosea Poepp. Et Endl.	IV-VIII	Shrub	Yellow-envés Pink	Endemic
	Asteraceae	Mutisia sinuata Cav.	III-VII	Shrub	White- enves Pink	Non-endemic
	Asteraceae	Mutisia subulata Ruiz et Pav. Fma. Rosmarinifolia (Poepp. Et Endl.) Cabrera	IV-VIII	Shrub	Red or orange	Non-endemic
	Asteraceae	Mutisia ledifolia Decne. Ex Wedd.	XV-II	Shrub	White	Non-endemic
	Asteraceae	Mutisia cana Poepp. Et Endl.	III-V, R.M.	Shrub		Endemic
	Asteraceae	Mutisia decurrens Cav.	VI-IX, XI, XVI	Shrub		Non-endemic
	Asteraceae	Mutisia ilicifolia Cav.	IV-VII, XVI	Shrub		Endemic
	Asteraceae	Nardophyllum chiliotrichoides A. Gray	V, R.M.	Shrub	Yellow	Non-endemic
	Asteraceae	Nardophyllum lanatum (Meyen) Cabrera	IV-VI	Shrub	Yellow	Non-endemic
	Asteraceae	Nassauvia axillaris (Lag.)D.Don	IV-R.M.	Shrub	White	Non-endemic
	Asteraceae	Nassauvia aculeata (Less.)Poepp. Et Endl.	V-IX	Shrub	White	Non-endemic
	Asteraceae	Nassauvia lagascae (D.Don) F.Meigen	IV-IX	SubShrub	pink-White or lila	Non-endemic
	Asteraceae	Nassauvia looseri Cabrera	R.M.	SubShrub	White or pink	Endemic
	Asteraceae	Nassauvia glomerata (Gillies ex D.Don)	V-VII	SubShrub		Non-endemic
	Asteraceae	Nassauvia uniflora (D.Don) Hauman	IV	SubShrub	White	Non-endemic
	Asteraceae	Nassauvia cumingii Hook. Et Arn.	IV-VII, R.M.	SubShrub	White	Non-endemic
	Asteraceae	Nassauvia pyramidalis Meyen	VI-VIII, R.M.	SubShrub		Non-endemic
	Asteraceae	Nassauvia dentata Griseb.	X-XII	SubShrub		Non-endemic
	Asteraceae	Nassauvia ramosissima DC.	VI-VII	SubShrub		Endemic
	Asteraceae	Nassauvia digitata Wedd.	VII-IX	SubShrub	White	Non-endemic
	Asteraceae	Nassauvia pinnigera D.Don	R.M.	SubShrub	Pink lilacea	Non-endemic
	Asteraceae	Nassauvia revoluta D.Don	VII-XII	SubShrub	White	Non-endemic
	Asteraceae	Nassauvia argentea Phil.	IX-XIV	Shrub		Non-endemic
	Asteraceae	Nassauvia sprengelioides DC.	VII-IX	SubShrub	White	Non-endemic
	Asteraceae	Nassauvia pygmaea (Cass.) Hook	XVI-XIV	Shrub		Non-endemic
	Rubiaceae	Oreopolus glacialis (Poepp. Et Endl.) Ricardi	V-XII	SubShrub	Yellow limon or Yellow Orange	Non-endemic
	Asteraceae	Parastrephia lepidophylla (Wedd.) Cabrera	XV-I, II	Shrub	Yellow or Orange	Non-endemic
	Asteraceae	Parastrephia lucida (Meyen) Cabrera	XV-I, II	Shrub	Yellow or Orange	Non-endemic
	Asteraceae	Parastrephia quadrangularis (Meyen) Cabrera	XV-I, II	Shrub	Yellow or Orange	Non-endemic
	Asteraceae	Parastrephia teretiuscula (Kuntze) Cabrera	II	Shrub	Yellow or Orange	Non-endemic
	Asteraceae	Polyachyrus carduoides Phil.	II-IV	Shrub	Whites	Non-endemic
	Asteraceae	Polyachyrus sphaerocephalus D. Don	XV-I, II	Shrub	pink pale	Non-endemic
	Grossulariaceae	Ribes cucullatum Hook. Et Arn.	R.M.-X	Shrub	Green-red por dentro	Non-endemic
	Grossulariaceae	Ribes magellanicum Pior.	X-XII	Shrub	Yellow	Non-endemic
	Grossulariaceae	Ribes polyanthes Phil.	R.M.	Shrub	Yellow limón	Endemic
	Asteraceae	Senecio atacamensis Phil.	I-II	Shrub	Orange	Endemic
	Asteraceae	Senecio eriophyton J.Remy	II-IV	Shrub	Yellow	Non-endemic
	Asteraceae	Senecio dryophyllus Meyen et Walp.	XV-I, II	Shrub	Yellow	Non-endemic
	Asteraceae	Senecio nutans Sch.Bip	XV-I, II	Shrub	Yellow or Orange	Non-endemic
	Asteraceae	Senecio viris Phil.	XV-II	Shrub	Yellow with Red	Non-endemic
	Asteraceae	Senecio argyreus Phil	IX-XII	Shrub	Yellow	Non-endemic
	Asteraceae	Senecio sericeonitens Speg.	XI-XII	Shrub	Yellow	Non-endemic
	Asteraceae	Senecio chionophilus Phil.	IX-XI	Shrub	Yellow	Non-endemic
	Asteraceae	Senecio poeppigii Hook. et Arn.	VII-X	Shrub	Yellow	Non-endemic
	Asteraceae	Senecio looseri Cabrera	IV-R.M.	SubShrub		Non-endemic
	Asteraceae	Senecio lorentziella Hicken	IV-V	Shrub		Non-endemic
	Asteraceae	Senecio rahmeeri Phil.	III	Shrub	Orange	Endemic
	Asteraceae	Senecio sundtii Phil.	II-III	Shrub	Yellow	Endemic
	Asteraceae	Senecio volckmannii Phil.	I-IV	Shrub	Yellow	Non-endemic
	Asteraceae	Senecio baccharidifolius Poepp. ex DC.	VII-IX	Shrub	Yellow	Non-endemic
	Asteraceae	Senecio pilquensis Buek	VIII-IX	Shrub	Yellow or red	Non-endemic
	Asteraceae	Senecio espinosae Cabrera	VII	Shrub	Yellow or red	Endemic
	Asteraceae	Senecio coronopodiphyllus J.Remy	V-VI	Shrub	Yellow	Non-endemic
	Asteraceae	Senecio algens Wedd.	XV-I, II	SubShrub	Yellow	Non-endemic
	Asteraceae	Senecio bipontini Wedd.	VII-X	SubShrub		Endemic
	Asteraceae	Senecio peteroanus Phil.	VII	Shrub		Non-endemic
	Asteraceae	Senecio gnidioides Phil.	VIII	Shrub		Non-endemic
	Asteraceae	Senecio hickenii Hauman	V	Shrub		Non-endemic
	Asteraceae	Senecio crithmoides Hook. Et Arn.	V-VII	SubShrub	Yellow-reddish	Non-endemic
	Asteraceae	Senecio renjifoanus Phil	R.M.	Shrub		Non-endemic
	Asteraceae	Senecio pachyphyllos Cabrera	R.M.	Shrub		Non-endemic
	Asteraceae	Senecio pachyphyllos J.Remy	VI-VII	SubShrub creeping	Yellow	Non-endemic
	Asteraceae	Senecio micropifolius DC.	III-IV	Shrub	Yellow	Endemic
	Asteraceae	Senecio tacorensis Cabrera	XV, I	Shrub	Yellow	Non-endemic
	Asteraceae	Senecio xerophilus Phil.	II, III	Shrub	Yellow	Endemic
	Asteraceae	Senecio behnii Ricardi et Martic.	XV-I	SubShrub	Yellow	Endemic
	Asteraceae	Senecio coscayanus Ricardi	I	SubShrub		Endemic
	Asteraceae	Senecio franciscii phil.	IV-VII	SubShrub	Yellow	Non-endemic
	Asteraceae	Senecio linariifolius Poepp. Ex DC.	VI-IX	SubShrub	Yellow	Non-endemic
	Asteraceae	Senecio philippii Sch. Bip. Ex Wedd.	X-XII	SubShrub	Yellow	Non-endemic
	Asteraceae	Senecio donianus Hook. Et Arn.	IV-R.M.	SubShrub	Yellow	Non-endemic
	Asteraceae	Senecio davilae Phil	V-VI	Shrub		Endemic
	Asteraceae	Senecio santiagoensis Kuntze	R.M.	Shrub	Yellow	Endemic
	Asteraceae	Senecio monttianus J.Rémy	R.M.-VI	Shrub		Endemic
	Asteraceae	Senecio glaber Less.	V-VII	Shrub	Yellow	Non-endemic
	Asteraceae	Senecio eruciformis J. Remy	V, R.M.	Shrub		Non-endemic
	Asteraceae	Senecio chillanensis Cabrera	XVI	Shrub		Endemic
	Asteraceae	Senecio microphyllus phil.	IV-VII	Shrub	Yellow	Non-endemic
	Asteraceae	Senecio reicheanus Cabrera	XV, I	Shrub	Yellow	Non-endemic
	Asteraceae	Senecio triodon phil.	VII-XII	SubShrub creeping	Yellow	Non-endemic
	Fabaceae	Senna birostris (Dombey ex Vogel) H.S.Irwin et Barneby	XV	Shrub	Yellow	Non-endemic
	Solanaceae	Solanum nitidum Ruiz et Pav.	XV, I	Shrub	Lila	Non-endemic
	Malvaceae	Tarasa operculata (Cav.) Krapov	XV-II	SubShrub	Lila	Non-endemic
	Rosaceae	Tetraglochin alata (Gillies ex Hook. Et Arn.) Kuntze	IV-VIII	Shrub		Non-endemic
	Rosaceae	Tetraglochin cristata (Britton) Rothm.	XV	Shrub	Red	Non-endemic
	Escalloniaceae	Tribeles australis Phil.	X-XII	Shrub	White	Non-endemic
	Asteraceae	Trixis cacalioides (Kunth) D. Don	XV-I	Shrub	Yellow	Non-endemic
	Vivianiaceae	Viviania marifolia Cav.	III-VII, XVI	SubShrub	Pink	Non-endemic
	Ledocarpaceae	Wendtia gracilis Meyen	IV-XIV	SubShrub	Yellow	Non-endemic
	Cactaceae	Austrocatus spiniflorus (Phil.) F. Ritter	R.M., VI	Sub shrub	reddish	Endemic
	Cactaceae	Airampoa soehrensii (Britton & Rose) Lodé	XV, I - II	Shrub	Yellow	Non-endemic
	Cactaceae	Corryocactus brevistylus (K.Schum. ex Vaupel) Britton & Rose	XV, I	Shrub	Intense yellow	Non-endemic
	Cactaceae	Cumulopuntia boliviana (Salm-Dyck) F.Ritter	XV, I - II	Sub shrub	Yellow, orange, red	Non-endemic
	Cactaceae	Cumulopuntia sphaerica (C.F. Först.) E.F. Anderson	XV-R.M.	Sub shrub	Intense yellow	Non-endemic
	Cactaceae	Haageocereus fascicularis (Meyen) F.Ritter	XV- I	Shrub	White	Endemic
	Cactaceae	Soehrensia formosa (Pfeiff.) Backeb.	II	Sub shrub	Yellow	Non-endemic
	Cactaceae	Maihuenia poeppigii (Otto ex Pfeiff.) K. Schum.	VII-VIII	Sub shrub	Yellow- red	Non-endemic
	Cactaceae	Maihueniopsis atacamensis (Phil.) F. Ritter	III	Sub shrub	Yellow	Endemic
	Cactaceae	Maihueniopsis glomerata (Haw.) R. Kiesling	II - IV	Sub shrub	Yellow	Non-endemic
	Cactaceae	Maihueniopsis ovata (Pfeiff.) F. Ritter	V-R.M.	Sub shrub	Yellow	Non-endemic
	Cactaceae	Neowerdermannia chilensis Backeb.	XV, I	Sub shrub	pink or White	Endemic
	Cactaceae	Oreocereus hempelianus (Gürke) D.R. Hunt	XV-I	Shrub	red	Non-endemic
	Cactaceae	Oreocereus leucotrichus (Phil.) Wagenkn. ex F. Ritter	XV, I, II	Shrub	red	Non-endemic
	Cactaceae	Eriosyce curvispina (Bertero ex Colla) Katt.	III - VIII, R.M.	Shrub	Red with Yellow border	Endemic
Herbaceous	Rosaceae	Acaena alpina Poepp. ex Walp.	V, IX	Herb		Non-endemic
	Rosaceae	Acaena leptacantha Phil.	R.M., X	Herb		Non-endemic
	Rosaceae	Acaena macrocephala Poepp.	VII, XIV	Herb	Purple	Endemic
	Rosaceae	Acaena magellanica Vahl	IV-XII	Creeping herb	Green to Purple	Non-endemic
	Rosaceae	Acaena pinnatifida Ruiza et Pav.	IV-XII	Herb		Non-endemic
	Rosaceae	Acaena splendens Hook. et Arn.	IV-VII	Herb		Non-endemic
	Fabaceae	Adesmia arachnipes Clos	IV-VI	Creeping herb	Yellows	Endemic
	Fabaceae	Adesmia aspera Gillies ex Hook. Et Arn	IV-VIII	Herb		Non-endemic
	Fabaceae	Adesmia exilis Clos	IV, VII	Creeping herb		Non-endemic
	Fabaceae	Adesmia longipes Phil.	VIII-X	Herb	Yellow linesreds	Non-endemic
	Fabaceae	Adesmia longiseta DC.	R.M.-VIII	Creeping herb		Endemic
	Fabaceae	Adesmia rahmeri Phil.	I, II	Herb		Non-endemic
	Fabaceae	Adesmia capitellata (Clos) Hauman	III, R.M.	Herb	Yellow	Non-endemic
	Fabaceae	Adesmia glomerula Clos	R.M.-VIII	Herb	Yellow	Non-endemic
	Fabaceae	Adesmia parvifolia Phil.	VII-XII	Herb	Yellow- Sky blue or White	Non-endemic
	Fabaceae	Adesmia retusa Griseb.	XIV-X	Herb	Yellow	Non-endemic
	Fabaceae	Adesmia spuma Werdermm. Ex Burkart	III, IV	Herb	Yellow linesreds	Non-endemic
	Alstroemeriaceae	Alstroemeria andina Phil.	III, IV	Rhizomatous herb	Pink pale	Endemic
	Alstroemeriaceae		IV, V	Rhizomatous herb	Pink intense	Non-endemic
	Alstroemeriaceae	Alstroemeria exerens Meyen	R.M.- VII	Rhizomatous herb	Pink intense to lila	Non-endemic
	Alstroemeriaceae	Alstroemeria pallida Graham	V-R.M.	Rhizomatous herb	White-pink pale	Endemic
	Alstroemeriaceae	Alstroemeria pseudospathulata Bayer	VII	Rhizomatous herb	Gold Yellow	Non-endemic
	Alstroemeriaceae	Alstroemeria spathulata C. Presl	V	Rhizomatous herb	pink	Endemic
	Alstroemeriaceae	Alstroemeria umbellata Meyen	R.M.-VI	Rhizomatous herb	pink	Endemic
	Primulaceae	Anagallis alternifolia Cav.	II-XII	Herb	White or pink	Non-endemic
	Cariofilaceae	Arenaria rivularis Phil.	XV-IV	Creeping herb	White	Non-endemic
	Cariofilaceae	Arenaria serpens Kunth	III-XII	Creeping herb	White	Non-endemic
	Bignoniaceae	Argylia adscendens DC.	IV-VI	Herb	Yellow	Endemic
	Bignoniaceae	Argylia bifrons Phil.	III	Herb	Yellow	Endemic
	Bignoniaceae	Argylia checoensis (Meyen) I.M.Johnst.	III	Herb	Yellow	Endemic
	Bignoniaceae	Argylia potentillifolia DC.	III, IV	Herb	Yellow	Endemic
	Schoepfiaceae	Arjona patagonica Hombr. et Jacquinot ex Decne.	IV-XII	Rhizomatous herb	White-Purplish-pink	Non-endemic
	Plumbaginaceae	Armeria maritima (Mill.) Willd.	V-XII	Rhizomatous herb	pink	Non-endemic
	Fabaceae	Astragalus curvicaulis (Clos) Reiche	IV-VI	Herb	red-Purple	Endemic
	Fabaceae	Astragalus darumbium Gay	R.M., VI	Herb	Yellow pale	Endemic
	Fabaceae	Astragalus looseri I.M.Johnst.	IV-VI	Herb	Purple or violet	Non-endemic
	Fabaceae	Astragalus pehuenches Niederl.	R.M., VII	Herb	Violet	Non-endemic
	Fabaceae	Astragalus vagus (Clos) Reiche	III, IV	Herb	pink- lila pale	Non-endemic
	Fabaceae	Astragalus arnottianus (Gillies ex hook. Et Arn.) Reiche	IV-VI	Herb	Purple	Non-endemic
	Fabaceae	Astragalus palenae (Phil.) Reiche	IX-XII	Herb		Non-endemic
	Fabaceae	Astragalus bustillosii Clos	I-IV	Herb		Non-endemic
	Fabaceae	Astragalus cruckshanksii (Hook. Et Arn.) Griseb.	III, VII	Herb	Purple	Non-endemic
	Fabaceae	Astragalus patagonicus (Phil.) Speg.	XII	Herb		Non-endemic
	Fabaceae	Astragalus minimus Vogel	XV, I	Herb	bluish-violet	Non-endemic
	Fabaceae	Astragalus vesiculosus Clos	IV-VII	Herb	red	Non-endemic
	Apiaceae	Azorella diversifolia Clos	V-XII	Herb	Yellow	Non-endemic
	Ranunculaceae	Barneoudia chilensis Gay	IV-R.M.	Herb	Yellow or White	Endemic
	Ranunculaceae	Barneoudia major Phil.	V, VI	Herb	Yellows	Non-endemic
	Ranunculaceae	Barneoudia balliana Britton	IV	Herb		Non-endemic
	Asteraceae	Belloa eriophora (J.Rémy) M.O.Dillon	R.M.	Herb		Endemic
	Asteraceae	Belloa nivea (Phil.) M.O.Dillon	VII-X	SubShrub		Nativo
	Loasaceae	Blumenbachia dissecta (Hook et Arn.) Weigend	IV-VII	Herb	Whiteivory	Non-endemic
	Loasaceae	Blumenbachia prietea Gay	VI-VIII	Herb	White-yellowish	Non-endemic
	Loasaceae	Blumenbachia silvestris Poepp.	VII-IX	Herb		Non-endemic
	Loasaceae	Caiophora cgoldnata (Gillies ex Arn.) Hook et Arn.	II-R.M.	Herb	White	Non-endemic
	Loasaceae	Caiophora chuquitensis (Meyen) Urb. et Gilg.	XIV-II	Herb	scarlet orange	Non-endemic
	Loasaceae	Caiophora rosulata (Wedd.) Urb. et Gilg.	I-III	Herb	orange reddish	Non-endemic
	Montiaceae	Calandrinia affinis Gillies ex Arn.	IV-VII	Rhizomatous herb	White or pink pale	Non-endemic
	Montiaceae	Calandrinia colchaguensis Barnéoud	VI-VIII	Rhizomatous herb		Non-endemic
	Montiaceae	Calandrinia caespitosa Gillies ex Arn.	II-IX	Rhizomatous herb	red-Purple-red-aorange- Yellow or White	Non-endemic
	Montiaceae	Calandrinia compacta Barnéoud	XV-IV	Rhizomatous herb	pink pale	Non-endemic
	Montiaceae	Calandrinia graminifolia Phil.	VII-X	Rhizomatous herb	pink or White	Non-endemic
	Calceolariaceae	Calceolaria arachnoidea Graham	III-VII, R.M.	Herb	Purple-reddish	Endemic
	Calceolariaceae	Calceolaria cana Cav.	IV-VIII	Herb	pink pale	Endemic
	Calceolariaceae	Calceolaria purpurea Graham	V, VI	Herb	red-Purple	Endemic
	Calceolariaceae	Calceolaria corymbosa Ruiz et Pav.	IV-IX, X, XVI, R.M.	Herb	Yellow	Endemic
	Calceolariaceae	Calceolaria filicaulis Clos	VII-X	Herb	Yellow	Non-endemic
	Calceolariaceae	Calceolaria paralia Cav.	VI-VIII	Herb	Yellow pale	Endemic
	Calceolariaceae	Calceolaria polyrhiza Cav.	VII-XII	Herb	Yellow	Non-endemic
	Calceolariaceae	Calceolaria uniflora Lam.	XI, XII	Herb	Yellow reddish	Non-endemic
	Calceolariaceae	Calceolaria volckmannii Phil.	VII-IX	Herb	Yellow	Non-endemic
	Calceolariaceae	Calceolaria tenella Poepp. Et Endl.	XVI-XII	Creeping herb	Yellow	Non-endemic
	Ranunculaceae	Caltha sagittata Cav.	IV-XII	Rhizomatous herb	Ivory	Non-endemic
	Ranunculaceae	Caltha appendiculata	VII-XII	Rhizomatous herb	Green-Ivoryeñas	Non-endemic
	Caliceraceae	Calycera herbaceous Cav.	IV-IX	Herb	White-greenish	Non-endemic
	Caliceraceae	Calycera sessiliflora Phil.	IV-R.M.	Herb	White	Endemic
	Brassicaceae	Cardamine cordata Barneoud	IV-X	Herb	White	Non-endemic
	Cariofilaceae	Cerastium humifusum Cambess.	IV-R.M.	Herb	White	Non-endemic
	Asteraceae	Chaetanthera chilensis (Willd.) DC.	IV-IX	Herb	Yellow	Non-endemic
	Asteraceae	Chaetanthera flabellata D.Don.	IV, VII	Herb	Yellow	Non-endemic
	Asteraceae	Chaetanthera flabellifolia Cabrera	IV	Herb	Yellow	Endemic
	Asteraceae	Chaetanthera kalinae A.M.R.Davies	III, IV	Herb	Yellow	Endemic
	Asteraceae	Chaetanthera lanata (Phil.) I.M.Johnst.	II, IV	Herb	Whites	Non-endemic
	Asteraceae	Chaetanthera renifolia (J.Remy) Cabrera	R.M.	Herb	White-rosacea	Endemic
	Asteraceae	Chaetanthera villosa D.Don	R.M.-XIV	Rhizomatous herb	Yellow	Non-endemic
	Asteraceae	Oriastrum acerosum (J.Remy) Benth. Et Hook.f	III-R.M.	Herb	White	Non-endemic
	Asteraceae	Oriastrum chilense (D.Don) Hook. et Arn.	IV, R.M.	Herb	White	Non-endemic
	Asteraceae	Oriastrum pulvinatum (Phil.) Hauman	III, IV	Herb	White	Non-endemic
	Montiaceae	Cistanthe cabrerae (Añon) Peralta	III-IV	Rhizomatous herb	pink	Non-endemic
	Montiaceae	Cistanthe frigida (Barnéoud) Peralta	III, R.M.	Rhizomatous herb	White	Non-endemic
	Montiaceae	Cistanthe picta (Gillies ex Arn.) Carolin ex Hershk.	II-VI	Rhizomatous herb	pink	Non-endemic
	Convolvulaceae	Convolvulus demissus Choisy	IV-VII	Creeping herb	White	Non-endemic
	Malvaceae	Cristaria andicola Gay	II-IV	Herb	violet dark to White	Non-endemic
	Malvaceae	Cristaria adenophora I.M.Johnst	III	Creeping herb		Endemic
	Malvaceae	Cristaria dissecta Hook. Et Arn.	XV-VI	Herb		Non-endemic
	Malvaceae	Cristaria gracilis Gay	I-IV	Herb		Non-endemic
	Rubiaceae	Cruckhanksia macrantha Phil.	III-IV	Herb	Gold Yellow	Non-endemic
	Rubiaceae	Cruckhanksia palmae Clos	IV-R.M.	Herb	Parda-yellowish	Endemic
	Borraginaceae	Cryptantha diffusa (Phil.) I.M.Johnst.	XV-IV	Herb	White	Non-endemic
	Borraginaceae	Cryptantha gnaphalioides (A. DC.) Reiche	II-IV	Herb	White	Endemic
	Borraginaceae	Cryptantha involucrata (Phil.) Reiche	III, IV	Herb	White	Endemic
	Fabaceae	Dalea pennelli (Mac Bride) Mac Bride	XV	Creeping herb	Yellow	Endemic
	Asteraceae	Doniophyton weddellii Katinas et Stuessy	II-IV	Herb	Yellow	Non-endemic
	Asteraceae	Doniophyton anomalum (D.Don) Kurtz	IX, R.M.	Herb		Non-endemic
	Brassicaceae	Draba gilliesii Hook. et Arn.	IV-XII	Herb	White	Non-endemic
	Onagraceae	Epilobium australe Poepp. ex Hausskn.	R.M.-XII	Herb	pink pale	Non-endemic
	Onagraceae	Epilobium barbeyanum H. Lév.	III-VIII	Herb	pink pale	Non-endemic
	Onagraceae	Epilobium densifolium Hausskn.	V-IX	Herb	pink-Purple	Non-endemic
	Onagraceae	Epilobium glaucum Phil.	IV-XII	Rhizomatous herb	pink	Non-endemic
	Onagraceae	Epilobium nivale Meyen	IV-XII	Herb	pink	Non-endemic
	Asteraceae	Erigeron andicola DC.	IV-XII	Herb	White- pink or reddish	Non-endemic
	Asteraceae	Erigeron ciliaris Phil.	XII	Herb	Bluish to pink	Non-endemic
	Asteraceae	Erigeron leptopetalus Phil.	III-IV	Herb	White or lila	Non-endemic
	Asteraceae	Erigeron myosotis Pers.	X-XII	Herb	lilacs	Non-endemic
	Phrymaceae	Erythranthe cuprea (Dombrain) G.L.Nesom	VI-IX	Herb	red-Orange or Yellow-Orange	Non-endemic
	Phrymaceae	Erythranthe depressa (Phil.) G.L.Nesom	II-IV	Herb	Yellow with Red	Endemic
	Phrymaceae	Erythranthe glabrata (Kunth) G.L.Nesom	XV, XII	Herb	Yellow with Red	Non-endemic
	Phrymaceae	Erythranthe lutea (L.) G.L.Nesom	III, VI-VII, R.M.	Herb	Yellow with Red	Endemic
	Euforbiaceae	Euphorbia collina Phil.	IV-VII	Herb	Purple	Non-endemic
	Euforbiaceae	Euphorbia germainii Phil.	IV-R.M.	Creeping herb	Yellow	Endemic
	Escrofulariaceae	Euphrasia andicola Benth.	V-X	Herb	Yellow or White	Non-endemic
	Escrofulariaceae	Euphrasia chrysantha Phil.	VII-IX	Herb	White parte inferior Yellow- Yellow or White	Non-endemic
	Escrofulariaceae	Euphrasia flavicans Phil.	IX-X	Herb	White or pink, Yellow	Non-endemic
	Escrofulariaceae	Euphrasia trifida Poepp. ex Benth.	VII-X	Herb	White, Yellow	Non-endemic
	Solanaceae	Exodeconus flavus (I.M.Johnst.) Axelius et D´Arcy	XV, I	Creeping herb	Yellow	Non-endemic
	Solanaceae	Exodeconus integrifolius (Phil.) Axelius	XV-I, II	Creeping herb	White to lila	Endemic
	Amarilidaceae	Famatina andina (Phil.) Rav.	R.M.	Herb	red	Endemic
	Amarilidaceae	Famatina cisandina Rav.	R.M.	Herb	red	Endemic
	Amarilidaceae	Famantina maulensis Rav.	VI, VII	Herb	red	Endemic
	Caliceraceae	Gamocarpha alpina (Poepp. ex Less.) H.V.Hansen	VI-VIII	Herb	White or Yellow	Non-endemic
	Gencianaceae	Gentiana prostrata Haenke	XV-XII	Herb	White to Blue	Non-endemic
	Gencianaceae	Gentianella magellanica (Gaudich.) Fabris ex D.M.Moore	VII-XII	Herb	White to BluePurple	Non-endemic
	Gencianaceae	Gentianella ottonis (Phil.) Muñoz	IV-VII	Herb	Bluea pale violet	Non-endemic
	Rosaceae	Geum magellanicum Pers.	V-XII	Herb	red- Yellow or Orange	Non-endemic
	Asteraceae	Hypochaeris acaulis (J. Remy) Britton	IV-IX	Rhizomatous herb	Yellow	Non-endemic
	Asteraceae	Hypochaeris barbata (Sch.Bip.) Reiche	XV, I	Herb	Yellow	Non-endemic
	Asteraceae	Hypochaeris montana (Phil.) Reiche	IV-VI	Herb	Yellow	Non-endemic
	Asteraceae	Hypochaeris taraxacoides (Meyen et Walp.) Benth. et Hook.	XV-II	Herb	White	Non-endemic
	Asteraceae	Hypochaeris tenuifolia (Hook. et Arn.) Griseb.	IV-X	Rhizomatous herb	Yellow	Non-endemic
	Solanaceae	Jaborosa caulescens Gillies ex Hook.	II-VII, R.M.	Herb	White-yellowish	Non-endemic
	Solanaceae	Jaborosa laciniata (Miers) Hunz. et Barboza	III-VII	Herb	violet dark	Non-endemic
	Lamiaceae	Kurzamra pulchella (Clos) Kuntze	III, IV	Herb	Lila pale	Non-endemic
	Amarilidaceae	Latace andina (Poepp.) Sassone	IV-VII	Herb	White	Non-endemic
	Fabaceae	Lathyrus magellanicus Lam.	IV-XII	Herb	violet	Non-endemic
	Fabaceae	Lathyrus multiceps Clos	VI-X	Rhizomatous herb	bluish to violet	Non-endemic
	Fabaceae	Lathyrus subandinus Phil.	V-VII	Herb	Purple-bluish or Sky blue	Non-endemic
	Asteraceae	Leucheria candidissima D.Don	R.M.-VII	Herb	White pink	Non-endemic
	Asteraceae	Leucheria hahnii Franch	XII	Herb	Blnaca to pink pale	Non-endemic
	Asteraceae	Leucheria salina (J.Remy) Dusén	IV-VI	Herb	White-pink	Non-endemic
	Asteraceae	Leucheria scrobiculata D.Don	V-VI	Herb	White que toman color bluish to pink	Non-endemic
	Asteraceae	Leucheria congesta D.Don	V-R.M.	Herb	White-pink	Non-endemic
	Asteraceae	Leucheria floribunda DC.	IV-VII	Herb	White	Non-endemic
	Asteraceae	Leucheria gilliesii Hook. et Arn	VII	Herb	pink	Non-endemic
	Asteraceae	Leucheria glacialis (Poepp.ex Less.) Reiche	VII-XI	Herb	Sky blue or lilaceae	Non-endemic
	Asteraceae	Leucheria polyclados (J.Remy) Reiche	III	Herb	White	Non-endemic
	Asteraceae	Leucheria rosea Poepp. Ex Less.	V-VII	Herb		Non-endemic
	Asteraceae	Leucheria runcinata D.Don	III-VII	Herb	Sky blue	Non-endemic
	Asteraceae	Leucheria thermarum (Phil.) Phil.	XVI-IX	Herb	Sky blue to lilacea	Non-endemic
	Loasaceae	Loasa longiseta Phil.	III, IV	Herb	White	Endemic
	Loasaceae	Loasa pallida Gillies ex Arn.	IV-R.M.	Herb	White	Endemic
	Loasaceae	Loasa prostrata Gillies ex Arn.	IV-VI	Herb	White	Endemic
	Loasaceae	Loasa lateritia Gillies ex Arn.	VII -IX	Rhizomatous herb	red-Orange	Non-endemic
	Loasaceae	Loasa caespitosa Phil.	R.M.	Herb	Yellow	Non-endemic
	Loasaceae	Loasa filicifolia Poepp.	VII, VIII	Rhizomatous herb	White	Non-endemic
	Loasaceae	Loasa nana Phil. Ex Urb. et Gilg	IX-X	Creeping herb	Yellow	Non-endemic
	Loasaceae	Loasa sigmoidea Urb. et Gilg	R.M.	Herb	Yellow	Endemic
	Campanulaceae	Lobelia oligophylla (Wedd.) Lammers	XV-XII	Herb	White	Non-endemic
	Fabaceae	Lupinus microcarpus sims	IV-VII	Herb	Purple-Blueo morado	Non-endemic
	Fabaceae	Lupinus oreophilus Phil.	XV-II	Herb	Lila suave	Non-endemic
	Malesherbiaceae	Malesherbia lactea Phil.	II-III	Rhizomatous herb	White	Non-endemic
	Malesherbiaceae	Malesherbia lanceolata Ricardi	IV	Herb	White yellowish	Endemic
	Malesherbiaceae	Malesherbia lirana Gay	III-IV, R.M.	Creeping herb	Ivory	Endemic
	Iridaceae	Mastigostyla cyrtophylla I.M Johnst.	XV, I	Herb	bluish to Purplish	Non-endemic
	Escrofulariaceae	Melosperma andicola Benth.	IV-VIII	Herb	Lila to White	Non-endemic
	Brassicaceae	Menonvillea cuneata (Gillies et Hook.) Rollins	III-R.M.	Herb	Ivory centro Purple	Non-endemic
	Brassicaceae	Menonvillea purpurea (G.T.Hastings) Rollins	R.M., VI	Herb	Yellow	Endemic
	Brassicaceae	Menonvillea flexuosa Phil.	V-R.M.	Herb		Endemic
	Brassicaceae	Menonvillea scapigera (Phil.) Rollins	R.M., VI	Herb	White-yellowish	Non-endemic
	Montiaceae	Montiopsis potentilloides (Barnéoud) D.I.Ford	IV-R.M.	Herb	pink	Non-endemic
	Montiaceae	Montiopsis sericea (Hook. et Arn.) D.I.Ford	IV-VII	Herb	pink	Endemic
	Montiaceae	Montiopsis gilliesii (Hook. et Arn.) D.I.Ford	IV-R.M.	Herb	pink pale or White	Non-endemic
	Montiaceae	Montiopsis umbellata (Ruiz et Pav.) D.I.Ford	IV-IX	Herb	Magenta dark	Non-endemic
	Montiaceae	Montiopsis andicola (Gillies ex Arn.) D.I.Ford	IV-VIII	Herb	pink suave or pink-Purple	Non-endemic
	Montiaceae	Montiopsis cistiflora (Gillies ex Arn.) D.I.Ford	IV-IX	Herb	pink pale to White	Non-endemic
	Montiaceae	Montiopsis gayana (Barnéoud) D.I.Ford	IV-VIII	Herb	pink	Non-endemic
	Caliceraceae	Nastanthus caespitosus (Phil.) Reiche	II, IV	Rhizomatous herb	White	Non-endemic
	Caliceraceae	Nastanthus scapigerus (J.Rémy) Miers	R.M.-VIII	Rhizomatous herb	White	Non-endemic
	Caliceraceae	Nastanthus ventosus (Meyen) Miers	IV-VIII	Rhizomatous herb	greenish	Non-endemic
	Solanaceae	Nolana foliosa (Phil.) I.M.Johnst.	XV, I	Herb	bluish dark	Endemic
	Malvaceae	Nototriche compacta (A.Gray) A. W. Hill	XV-VI	Herb	White or bluish	Endemic
	Malvaceae	Nototriche pulverulenta B.L.Burtt et A. W. Hill	XV, I	Herb	White to lila	Endemic
	Iridaceae	Olsynium frigidum (Poepp.) Goldblatt	R.M.-IX	Rhizomatous herb	Yellow	Non-endemic
	Iridaceae	Olsynium junceum (E. Mey. Ex C. Presl) Goldblatt	R.M.-IX	Rhizomatous herb	pink- lila or White	Non-endemic
	Iridaceae	Olsynium philippii (Klatt) Goldblatt	IV-VI	Rhizomatous herb	pink or White	Endemic
	Plantaginaceae	Ourisia alpina Poepp. et Endl.	VII-X	Herb	pink	Non-endemic
	Plantaginaceae	Ourisia coccinea (Cav.) Pers.	IV-XIV	Herb	red	Non-endemic
	Plantaginaceae	Ourisia fragrans Phil.	VIII-X	Herb	White to lilacea	Non-endemic
	Plantaginaceae	Ourisia microphylla Poepp. et Endl.	VII, VIII	SubShrub	pink	Non-endemic
	Plantaginaceae	Ourisia polyantha Poepp. et Endl.	R.M.-VI	SubShrub	red-Orange	Endemic
	Plantaginaceae	Ourisia ruelloides (L.f.) Kuntze	VI-XII	Rhizomatous herb	red intense yellow	Non-endemic
	Oxalidaceae	Oxalis adenophylla Gillies ex Hook. et Arn.	R.M.-VII	Herb	White-pink or violet	Non-endemic
	Oxalidaceae	Oxalis cinerea Zucc.	IV-VII	Herb	Yellow	Non-endemic
	Oxalidaceae	Oxalis compacta Gillies ex Hook. et Arn.	IV-VI	Herb	Yellow	Non-endemic
	Oxalidaceae	Oxalis colchaguensis Lourt	VI-VII	Herb		Non-endemic
	Oxalidaceae	Oxalis erythrorhiza Gillies ex Hook. et Arn.	III-VII	SubShrub herb	Yellow	Non-endemic
	Oxalidaceae	Oxalis hypsophila Phil.	II-IV	Herb	Yellow	Non-endemic
	Oxalidaceae	Oxalis penicillata Phil.	V, VI	Herb	Yellow	Non-endemic
	Oxalidaceae	Oxalis squamata Zucc.	IV-VIII	Herb	red	Non-endemic
	Asteraceae	Pachylaena atriplicifolia D.Don ex Hook. et Arn.	III-VII	Rhizomatous herb	red-Orange and Yellow	Non-endemic
	Asteraceae	Perezia carthamoides (D.Don) Hook. et Arn.	IV-VII	Rhizomatous herb	White- Yellow or lilaceae	Non-endemic
	Asteraceae	Perezia lyrata (J.Remy) Weddell	VI-X	Rhizomatous herb	bluish	Non-endemic
	Asteraceae	Perezia magellanica (L.f.) Lag.	XI, XII	Rhizomatous herb	White	Non-endemic
	Asteraceae	Perezia nutans Less.	V-IX	Rhizomatous herb	pink-lila or Purple	Non-endemic
	Asteraceae	Perezia pedicularidifolia Less.	VII-XI	Rhizomatous herb	Sky blue-bluish or White	Non-endemic
	Asteraceae	Perezia pilifera (D.Don) Hook. et Arn.	R.M.-XII	Rhizomatous herb	White	Non-endemic
	Asteraceae	Perezia poeppiggi Less.	IV-VII	Rhizomatous herb	Yellow-White or bluish	Endemic
	Asteraceae	Perezia Purpleta Wedd.	I-IV	Rhizomatous herb	White or pink-lilacea	Non-endemic
	Asteraceae	Perezia multiflora (Humb. & Bonpl.) Less.	XV	Rhizomatous herb	White	Non-endemic
	Asteraceae	Perezia reurvata (Vahl) Less.	VI-XII	Herb	White or bluish	Non-endemic
	Hidrofilaceae	Phacelia cumingii (Benth.) A.Gray	XV-R.M.	Herb	Purple	Non-endemic
	Hidrofilaceae	Phacelia secunda J.M.Gmel.	XV-XII	Herb	White or pale purplish	Non-endemic
	Hidrofilaceae	Phacelia setigera Gris. ex Wedd.	XV-III	Herb	Purplish	Non-endemic
	Hidrofilaceae	Phacelia pinnatifida Gris. ex Wedd.	XV-IV	Herb		Non-endemic
	Hidrofilaceae	Phacelia sinuata Phil.	III, IV	Herb		Non-endemic
	Poligalaceae	Polygala salasiana Gay	R.M.-VII	Herb	bluish-Sky blue	Non-endemic
	Apiaceae	Pozoa coriacea Lag.	IV-IX	Rhizomatous herb	Purple	Non-endemic
	Apiaceae	Pozoa volcanica Mathias et Constance	IX	Rhizomatous herb	Green-yellowish	Non-endemic
	Primulaceae	Primula magellanica Lehm.	XII	Herb	White or lila	Non-endemic
	Cariofilaceae	Pycnophyllum bryoides (Phil.) Rohrb.	XV-II	Herb		Non-endemic
	Cariofilaceae	Pycnophyllum macropetalum Mattf.	XV-II	Herb		Non-endemic
	Cariofilaceae	Pycnophyllum molle J.Remy	XV-III	Herb		Non-endemic
	Schoepfiaceae	Quinchamalium chilense Molina	III-VII	Herb	Yellow reddish	Non-endemic
	Schoepfiaceae	Quinchamalium dombeyi Brongn.	VII-X	Herb	Yellow reddish	Non-endemic
	Ranunculaceae	Ranunculus cymbalaria Pursh	IV-XII	Herb	Yellow	Non-endemic
	Ranunculaceae	Ranunculus peduncularis Sm.	IV-XII	Herb	Yellow	Non-endemic
	Ranunculaceae	Ranunculus semiverticillatus Phil.	X-XII	Rhizomatous herb	White	Non-endemic
	Amarilidaceae	Rhodophiala andicola (Poepp.) Traub	IX-XI	Herb	pink-Purple	Endemic
	Amarilidaceae	Rhodophiala araucana (Phil.) Traub	VII, IX	Herb	Yellow borde Pink	Endemic
	Amarilidaceae	Rhodophiala montana (Phil.) Traub	VII	Herb	Yellow	Endemic
	Amarilidaceae	Rhodophiala rhodolirion (Baker) Traub	IV-VII	Herb	White- pink oivory	Endemic
	Apiaceae	Sanicula graveolens Poepp. ex DC.	IV-IX	Herb	Yellow	Non-endemic
	Saxifragaceae	Saxifraga magellanica Pior.	XI-XII	Herb	White	Non-endemic
	Solanaceae	Schizanthus alpestris Poeep. ex Benth.	IV-R.M.	Herb	Lila pale	Endemic
	Solanaceae	Schizanthus grahamii Gillies ex Hook.	IV-VIII	Herb	Purple pale	Non-endemic
	Solanaceae	Schizanthus hookeri Gillies ex Graham	IV-IX	Herb	Purplish- pink or Purple	Non-endemic
	Solanaceae	Schizanthus integrifolius Phil.	III, IV	Herb	White	Endemic
	Brassicaceae	Schizopetalon rupestre (Barnéoud) Reiche	III, IV	Herb	White	Non-endemic
	Asteraceae	Senecio breviscapus DC.	IV-V	Herb	Yellow	Non-endemic
	Asteraceae	Senecio subdiscoideus Sch.Bip. ex Wedd.	V-XII	Herb	Yellow	Non-endemic
	Asteraceae	Senecio trifurcatus (G. Forst.) Less.	IX-XII	Rhizomatous herb	White	Non-endemic
	Asteraceae	Senecio zoellneri Martic. et Quezada	XV	Herb	Yellow	Non-endemic
	Cariofilaceae	Silene andicola Gillies ex Hook et Arn.	X	Herb	pink	Non-endemic
	Cariofilaceae	Silene chilensis (Naudin) Bocquet	IV-IX	Herb	White	Endemic
	Cariofilaceae	Silene plutonica Naudin	IX-X	Herb	White	Endemic
	Iridaceae	Sisyrinchium arenarium Poepp.	IV-IX	Rhizomatous herb	Yellow	Non-endemic
	Iridaceae	Sisyrinchium pearcei Phil.	IX-XI	Rhizomatous herb	Yellow pale	Endemic
	Solanaceae	Solanum etuberosum Lindl.	VI-VII	Herb	violet dark	Non-endemic
	Solanaceae	Solanum medians Bitter	XV-II	Herb	bluish or White	Non-endemic
	Solanaceae	Solanum paposanum Phil.	XV-IV	Herb	bluish or White	Non-endemic
	Iridaceae	Solenomelus segethi (Phil.) Kuntze	V-XI	Rhizomatous herb	Blue-Purplish	Non-endemic
	Cariofilaceae	Spergularia fasciculata Phil.	XV-II	Herb	White	Non-endemic
	Cariofilaceae	Spergularia pissisi (Phil.) I.M.Johnst.	III, IV	Herb	White	Non-endemic
	Lamiaceae	Stachys gilliesii Benth.	VI-VIII	Herb	pink	Non-endemic
	Lamiaceae	Stachys philippiana Vatke	IV-VI	Herb	red	Endemic
	Asteraceae	Tagetes multiflora Kunth	XV-III	Herb	Yellow-Orange	Non-endemic
	Asteraceae	Trichocline caulescens Phil.	XV-I, II	Herb	Yellow	Endemic
	Asteraceae	Trichocline deserticola Zardini	XV-II	Herb	White	Endemic
	Amarilidaceae	Ipheion sessile (Phil.) Traub	R.M.	Herb	White	Endemic
	Amarilidaceae	Tristagma nivale Poepp.	R.M.-IX	Herb	Green-yellowish	Non-endemic
	Tropaeolaceae	Tropaeolum incisum (Speg.) sparre	VI-X	Creeping herb	Yellow	Non-endemic
	Tropaeolaceae	Tropaeolum leptophyllum G.Don	VI-IX	Creeping herb	Yellow	Non-endemic
	Tropaeolaceae	Tropaeolum polyphyllum Cav.	IV-VII	Creeping herb	Dark orange to yellow	Non-endemic
	Tropaeolaceae	Tropaeolum rhomboideum Lem.	R.M.	Creeping herb	Yellow	Endemic
	Tropaeolaceae	Tropaeolum sessilifolium Poep. et Endl.	IV-VII	Creeping herb	Pink, yellow	Endemic
	Tropaeolaceae	Tropaeolum tricolor Sweet		Herb		Endemic
	Asteraceae	Urmenetea atacamensis Phil.	II	Herb	White	Non-endemic
	Valerianaceae	Valeriana carnosa Sm.	VI-XII	Herb	White	Non-endemic
	Valerianaceae	Valeriana foncki Phil.	VII-XI	Herb	pink	Non-endemic
	Valerianaceae	Valeriana macrorhiza Poepp. Ex DC.	VI-IX	Herb	White	Non-endemic
	Valerianaceae	Valeriana radicalis Clos	R.M.	Herb	White	Endemic
	Fabaceae	Vicia andina Phil.	R.M.-VII	Herb	Yellow, purplish	Non-endemic
	Fabaceae	Vicia bijuga Gillies ex Hook. Et Arn.	VII-XII	Rhizomatous herb	Lila	Non-endemic
	Fabaceae	Vicia graminea Sm.	VII-XII	Herb	Lila	Non-endemic
	Violaceae	Viola flühmannii Phil.	VIII-XIV	Herb	Lila- pink and White	Non-endemic
	Violaceae	Viola tridentata Sm.	X-XII	Herb	Lila to pink	Non-endemic
	Violaceae	Viola atropurpurea Leyb.	R.M.-VII	Herb	Purple- raro Yellow	Non-endemic
	Violaceae	Viola congesta Gillies ex Hook. Et Arn.	VI-VII	Herb	White or Purplish	Endemic
	Violaceae	Viola cotyledon Ging.	VII-X	Herb	Lila-bluish-Sky blue or White	Non-endemic
	Violaceae	Viola montagnei Gay	IV-VI	Herb	Purple	Endemic
	Violaceae	Viola philippii Leyb.	R.M.-VII	Rhizomatous herb	Light pink- lilac
	Violaceae	Viola reichei Skoottsb.	IX-XI	Rhizomatous herb	Yellow	Non-endemic
	Violaceae	Viola rosulata Poepp. Et Endl.	VII-IX	Herb	Dark Purple or White	Endemic
	Violaceae	Viola frigida Phil	II-IV	Herb	bluish- Sky blue or White	Non-endemic
	Violaceae	Viola subandina J.M.Watson	IV-XVI	Herb	pink dark to lila pale	Non-endemic
	Violaceae	Viola vallenarensis W.Becker	III, IV	Herb	Yellow or White	Endemic
	Asteraceae	Werneria aretioides Wedd.	XV-II	Herb	White	Non-endemic
	Asteraceae	Werneria glaberrima Phil.	I, II	Rhizomatous herb	White	Endemic
	Asteraceae	Werneria pinnatifida J.Remy	I-IV	Herb	Yellow	Non-endemic
	Asteraceae	Werneria pygmaea Gillies ex Hook. et Arn.	I-R.M.	Herb	White	Non-endemic
	Asteraceae	Werneria denticulata S.F. Blake	I-V, XIV, R.M.	Herb		Non-endemic
	Orquidaceae	Chloraea alpina Poepp.	VI - X, XIV, XVI, R,M.	Herb	Yellow	Non-endemic
	Orquidaceae	Chloraea gaudichaudii Brongn.	VIII - XII, XIV, XVI	Herb	White-greenish	Non-endemic
	Orquidaceae	Chloraea magellanica Hook.f	VII - XII, XIV, XVI	Herb	White-greenish or white greyish	Non-endemic
	Orquidaceae	Chloraea picta Phil. ex Kraenzl.	V - IX, R.M.	Herb	Yellow and greenish-black	Non-endemic
	Orquidaceae	Chloraea viridiflora Poepp.	VII-VIII, XVI	Herb	Greenish	Non-endemic
	Orquidaceae	Correorchis cylindrostachya (Poepp.) Szlach.	V - IX, XI, XVI, R.M.	Herb	White	Non-endemic
	Orquidaceae	Chloraea cylindrostachya Poepp.	VIII-XII	Herb	Greenish	Endemic
	Orquidaceae	Gavilea chica (Speg. & Kraenzl.) Chemisquy	IV-XII, XVI, R.M.	Herb	White	Non-endemic
	Orquidaceae	Gavilea glandulifera (Poepp.) M.N.Correa	V-XII, XVI, R.M.	Herb	White	Non-endemic
	Orquidaceae	Myrosmodes nervosa (Kraenzl.) Novoa, C. Vargas & Cisternas	XV, I - II	Herb	White	Non-endemic
	Cyperaceae	Carex andina Phil.	IV-XII, XVI, R.M.	Herb		Non-endemic
	Cyperaceae	Carex gayana E. Desv.	II-XII, XVI, R.M.	Herb		Non-endemic
	Cyperaceae	Carex macloviana d’Urv.	IV-XII, XIV, XVI, R.M.	Herb		Non-endemic
	Cyperaceae	Carex maritima	I-V, XII	Herb		Non-endemic
	Cyperaceae	Eleocharis pseudoalbibracteata S. González & Guagl.	I-XVI, R.M.	Herb		Non-endemic
	Cyperaceae	Phylloscirpus acaulis (Phil.) Goetgh. & D.A. Simpson	I-IX, XV, XVI	Herb		Non-endemic
	Cyperaceae	Phylloscirpus deserticola (Phil.) Dhooge & Goetgh.	I-IV, XV, R.M.	Herb		Non-endemic
	Cyperaceae	Schoenoplectus americanus (Pers.) Volkart ex Schinz & R. Keller	I-III, VI-VIII, X, XV,	Herb		Non-endemic
	Cyperaceae	Zameioscirpus atacamensis (Phil.) Dhooge & Goetgh.	Ι-ΙΙΙ-ΙV	Herb		Non-endemic
	Juncaceae	Distichia muscoides Nees & Meyen	I-II, XV	Herb		Non-endemic
	Juncaceae	Oxychloe andina Phil.	I-IV, XV, R.M.	Herb		Non-endemic
	Juncaceae	Oxychloe haumaniana (Barros) Barros	III-IV	Herb		Non-endemic
	Juncaceae	Oxychloe bisexualis Kuntze	IV-V, R.M.	Herb		Non-endemic
	Juncaceae	Patosia clandestina (Phil.) Buchenau	II-V, VIIIX, XVI, R.M.	Herb		Non-endemic
	Juncaceae	Juncus stipulatus Nees & Meyen	I-XIV, XVI, R.M.	Herb		Non-endemic
	Juncaceae	Juncus balticus Willd.	II-IV, VII,X, XIV, R.M.	Herb		Non-endemic
	Juncaceae	Luzula chilensis Nees & Meyen ex Kunth	IV-XII, XIV, XVI, R.M.	Herb		Non-endemic
	Juncaceae	Marsippospermum grandiflorum (L. f.) Hook. f.	IX-XII, XIV, XVI	Herb		Non-endemic
	Poaceae	Bromus burkartii Muñoz	IX	Herb		Endemic
	Poaceae	Bromus coloratus Steud.	IX-XII, XIV, R.M.	Herb		Non-endemic
	Poaceae	Bromus setifolius J. Presl	III-V, VII-IX,XI-XII, XVI, R.M.	Herb		Non-endemic
	Poaceae	Bromus tunicatus Phil.	VI-XII, XVI, R.M.	Herb		Non-endemic
	Poaceae	Deyeuxia crispa Rúgolo & Villav.	I-II, XV	Herb		Non-endemic
	Poaceae	Deyeuxia poaeoides (Steud.) Rúgolo	XI-XII	Herb		Non-endemic
	Poaceae	Deyeuxia curvula Wedd.	XI-XII	Herb		Non-endemic
	Poaceae	Deyeuxia chrysantha J. Presl	I-IV, XV	Herb		Non-endemic
	Poaceae	Deyeuxia eminens J. Presl	II	Herb		Non-endemic
	Poaceae	Deyeuxia velutina Nees & Meyen	I-IV	Herb		Non-endemic
	Poaceae	Festuca chrysophylla Phil.	I-II, XV	Herb		Non-endemic
	Poaceae	Festuca werdermannii St.-Yves	II-IV	Herb		Non-endemic
	Poaceae	Festuca acanthophylla E. Desv.	II, IV,-XII, XIV, XVI, R.M.	Herb		Non-endemic
	Poaceae	Festuca kurtziana St.-Yves	IV, VII, R.M.	Herb		Non-endemic
	Poaceae	Hordeum comosum J. Presl	I-XII, XIV-XVI, R.M.	Herb	Purple	Non-endemic
	Poaceae	Hordeum pubiflorum Hook.f.	II-IV, VI-VII, XI-XII, R.M.	Herb	Purple	Non-endemic
	Poaceae	Poa gayana E. Desv.	IV-VII, XVI, R.M.	Herb		Non-endemic
	Poaceae	Poa holciformis J. Presl	IV-IX, XVI, R.M.	Herb		Non-endemic
	Poaceae	Poa obvallata Steud.	V-XI, XIV, XVI, R.M.	Herb		Non-endemic
	Poaceae	Poa alopecurus (Gaudich. ex Mirb.) Kunth	IX-XII	Herb		Non-endemic
	Poaceae	Pappostipa frigida (Phil.) Romasch	I-IV, VII, XV, R.M.	Herb		Non-endemic
	Poaceae	Nassella nardoides (Phil.) Barkworth	I-II, XV	Herb		Non-endemic
	Poaceae	Jarava leptostachya (Griseb.) F. Rojas	I-II, XV	Herb		Non-endemic
	Poaceae	Anatherostipa venusta (Phil.) Peñail.	I-II, XV	Herb		Endemic
	Poaceae	Anatherostipa bomanii (Hauman) Peñail.	I-II, XV	Herb		Non-endemic
	Poaceae	Pappostipa chrysophylla (E. Desv.) Romasch.	I-VII, XV, R.M.	Herb	Silver	Non-endemic
	Poaceae	Jarava pogonathera (E. Desv.) Peñail.	II-V, VII, R.M.	Herb		Non-endemic
